# Supplementary material for: The unprecedented synthesis of novel spiro-1,2,4-triazolidinones
Source: Royal Society of Chemistry journal article supplement (doi:10.1039/c3ra44641g), 2013-01-01

## Supporting Information

### The unprecedented synthesis of novel spiro-1,2,4-triazolidinones

Dattaprasad M. Pore<sup>a\*</sup>, Pravin G. Hegade<sup>a</sup>, Mansing M. Mane<sup>a</sup>, Jayavant D. Patil<sup>a</sup>

Department of Chemistry, Shivaji University, Kolhapur 416 004, India

E-mail: [p\\_dattaprasad@rediffmail.com](mailto:p_dattaprasad@rediffmail.com) ; Tel.: +91 231 2690571; fax: +91 231 2692333

**Table of content:** **Page No.**

|          |                                                                     |             |
|----------|---------------------------------------------------------------------|-------------|
| <b>A</b> | <b>General information</b>                                          | <b>1</b>    |
| <b>B</b> | <b>Typical procedure</b>                                            | <b>1</b>    |
| <b>C</b> | <b>Spectral data of Gly-NO<sub>3</sub><sup>-</sup> ionic liquid</b> | <b>2-3</b>  |
| <b>D</b> | <b>Spectral data of spiro-1,2,4-triazolidinones derivatives</b>     | <b>4-30</b> |

#### A. General:

IR spectra were recorded on a Perkin–Elmer FT-IR 783 spectrophotometer. NMR spectra were recorded on a BrukerAC-300 MHz spectrometer in DMSO-d<sub>6</sub> using tetramethylsilane as internal standard. Mass spectra were recorded on a Shimadzu QP2010 GCMS. Ionic liquids Gly-NO<sub>3</sub><sup>-</sup>, Gly-PF<sub>6</sub><sup>-</sup> and Gly-Cl<sup>-</sup> were prepared following the literature procedure<sup>19</sup>.

#### B. Typical procedure:

In a 50 mL round-bottom flask, to a mixture of isatin (1 mmol) and semicarbazide or thio semicarbazide (1.2 mmol) in water (5 mL), glycine nitrate (50 mol %) was added. The reaction mixture was stirred at 80 °C for the time specified in Table 2. The progress of reaction was monitored by TLC. After completion of the reaction, the reaction mixture was filtered to yield corresponding product. These products were characterized by usual spectral techniques. (*i.e.* IR, <sup>1</sup>H; <sup>13</sup>C NMR and MS).

**Spectral data of Gly-NO<sub>3</sub><sup>-</sup> ionic liquid:** <sup>1</sup>H-NMR (300 MHz, DMSO-d<sub>6</sub>): δ 8.16 (s, 3H, -NH<sub>3</sub>), 3.72 (s, 2H); <sup>13</sup>C-NMR (75 MHz, DMSO-d<sub>6</sub>): δ 169.20, 40.29.

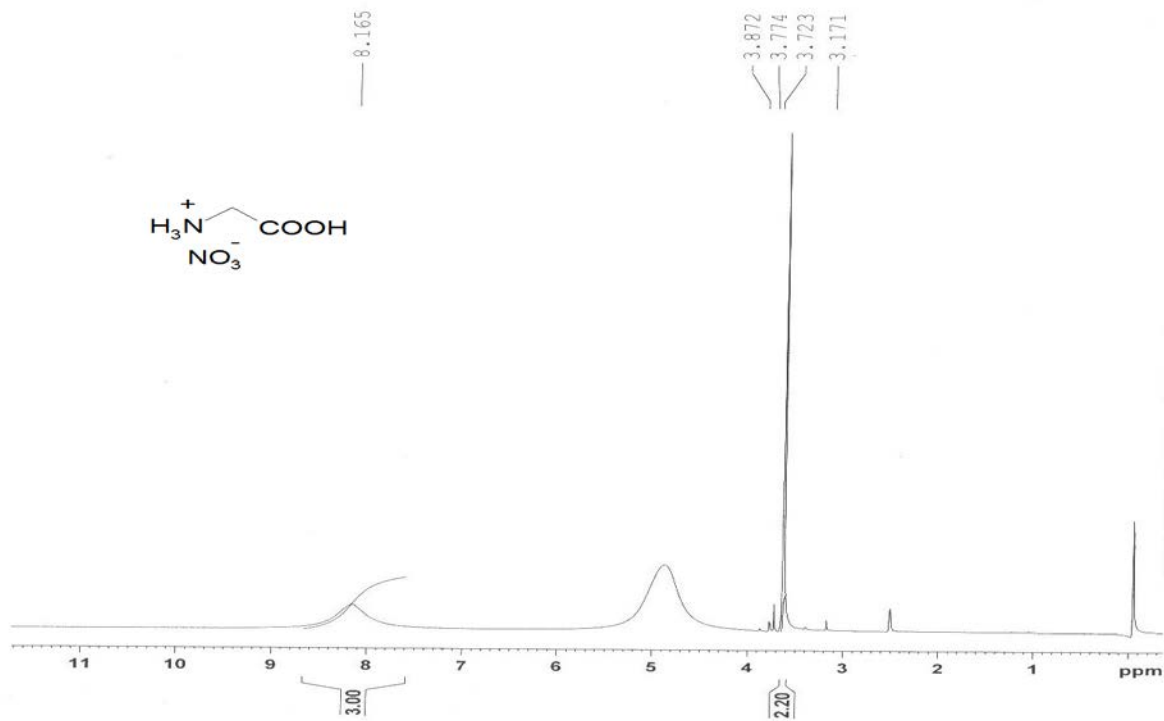

**<sup>1</sup>H-NMR of Gly-NO<sub>3</sub><sup>-</sup> ionic liquid**

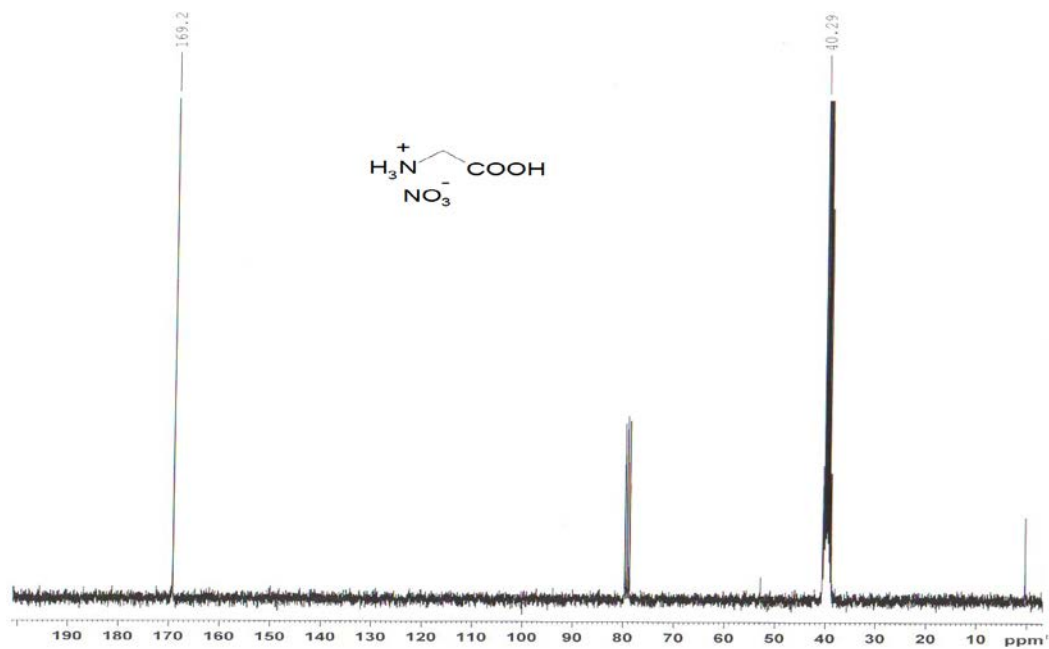

$^{13}\text{C-NMR}$  of Gly- $\text{NO}_3^-$  ionic liquid

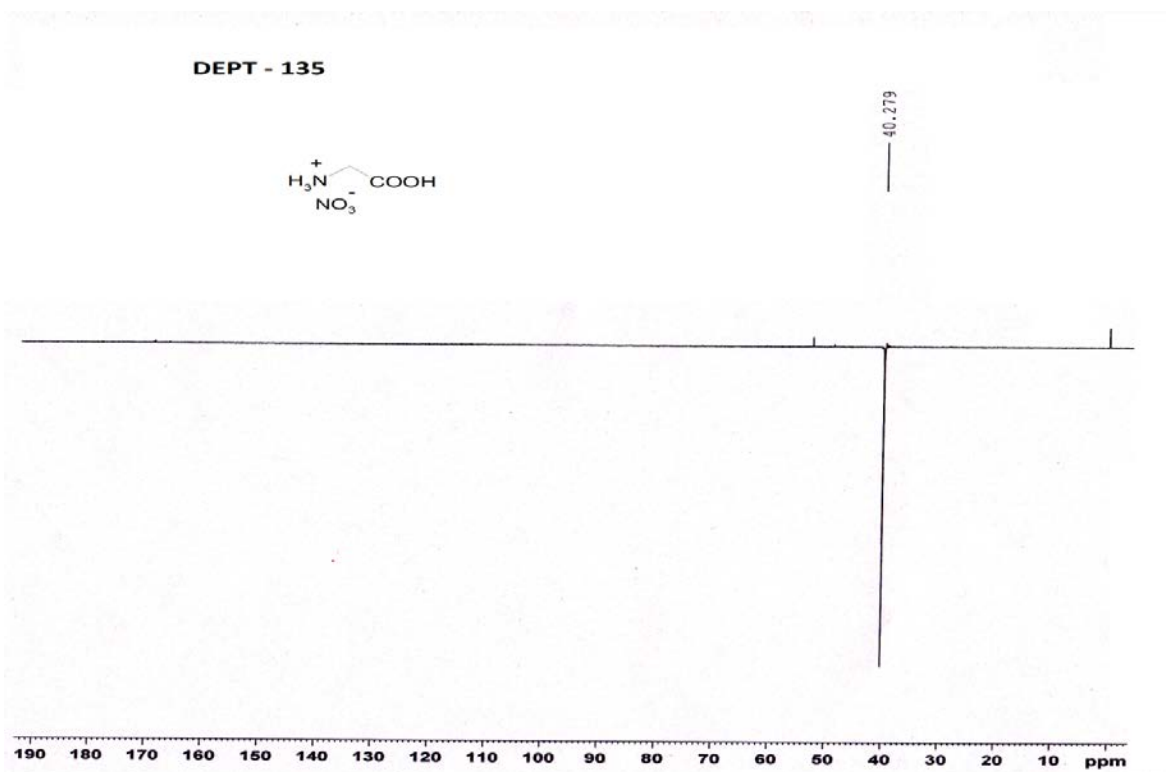

DEPT-135 of Gly- $\text{NO}_3^-$  ionic liquid

### Spectral data of synthesized compounds:

**Entry a, Table 2a:** Yellow solid; M.P. 255-257 °C; IR (KBr): 3625, 3402, 3344, 3169, 1721, 1695, 1606, 1452, 1353, 1199, 1164, 1111, 952 cm<sup>-1</sup>; <sup>1</sup>H-NMR (300 MHz, DMSO-d<sub>6</sub>): δ 10.74 (s, 1H, -NH, D<sub>2</sub>O exchangeable), 10.19 (s, 1H, -NH, D<sub>2</sub>O exchangeable), 8.04-8.07 (d, 1H, *J*=15 Hz), 7.31-7.36 (t, 1H, *J* = 15 Hz), 7.00-7.05 (t, 1H, *J*=15 Hz), 6.87-6.93 (s, 1H, s, 2-NH, D<sub>2</sub>O exchangeable). <sup>13</sup>C-NMR (75 MHz, DMSO-d<sub>6</sub>): Due to insufficient solubility we are unable to scan its <sup>13</sup>C NMR; MS (EI): 204.18 (m/z).

**Entry b, Table 2a:** Yellow solid; M.P. 265-267 °C (dec); IR (KBr) : 3469, 3200, 3180, 1718, 1694, 1591, 1476, 1195, 1114, 867 cm<sup>-1</sup>; <sup>1</sup>H-NMR (300 MHz, DMSO-d<sub>6</sub>): δ 10.85 (s, 1H, -NH, D<sub>2</sub>O exchangeable), 10.48 (s, 1H, -NH, D<sub>2</sub>O exchangeable), 8.37 (s, 1H), 7.50 (s, 1H), 6.85 (s, 3H); <sup>13</sup>C-NMR (75 MHz, DMSO-d<sub>6</sub>): δ 165, 156.34, 142.37, 134.18, 131.98, 127.86, 117.73, 113.88, 112.60; MS (EI): 283.08 (m/z), 285 (M+2).

**Entry c, Table 2a:** Yellow solid; M.P. 289-290 °C (dec); IR (KBr) : 3200, 1718, 1693, 1592, 1476, 1441, 1398, 1300, 1200, 1114, 966 cm<sup>-1</sup>; <sup>1</sup>H-NMR (300 MHz, DMSO-d<sub>6</sub>): δ 10.85 (s, 1H, -NH, D<sub>2</sub>O exchangeable), 10.46 (s, 1H, -NH, D<sub>2</sub>O exchangeable), 8.25-8.26 (d, 1H, *J* = 3Hz), 7.362-7.396 (dd, 1H, *J* = 8.4, 8.1Hz ), 6.87-6.94 (s, 1H, s, 2-NH, D<sub>2</sub>O exchangeable); <sup>13</sup>C NMR (75 MHz, DMSO-d<sub>6</sub>): δ 165.15, 156.31, 141.99, 132.09, 131.35, 126.21, 125.24, 117.25, 112.11; MS (EI): 238.63 (m/z).

**Entry d, Table 2a:** Yellow solid; M.P. 277-278 °C; IR (KBr) : 3484, 3463, 3415, 3394, 3343, 3164, 1710, 1679, 1587, 1193, 1095, 825 cm<sup>-1</sup>; <sup>1</sup>H-NMR (400 MHz, DMSO-d<sub>6</sub>): δ 10.78 (s, 1H, -NH, D<sub>2</sub>O exchangeable), 10.45 (s, 1H, -NH, D<sub>2</sub>O exchangeable), 8.46 (s, 1H), 7.656-7.679 (dd, 1H, *J* = 6, 6Hz), 6.72-7.05 (m, 1H, s, 2-NH, D<sub>2</sub>O exchangeable); <sup>13</sup>C NMR (100 MHz, DMSO-d<sub>6</sub>): δ 164.14, 155.88, 142.34, 141.51, 132.67, 117.71, 112.56, 84.41; MS (EI): 330.08 (m/z).

**Entry e, Table 2a:** Pale yellow solid; M.P.> 300 °C; IR (KBr): 3504, 3384, 3156, 3117, 1717, 1583, 1479, 1347, 1309, 1200, 1146, 1103, 960 cm<sup>-1</sup>; <sup>1</sup>H-NMR (300 MHz, DMSO-d<sub>6</sub>): δ 11.28 (s, 1H, -NH, D<sub>2</sub>O exchangeable), 10.96 (s, 1H, -NH, D<sub>2</sub>O exchangeable), 9.04 (s, 1H), 8.116-8.183 (dd, 1H, *J* = 11.4, 18Hz ), 6.90-7.00 (s, 1H, s, 2-NH, D<sub>2</sub>O exchangeable)<sup>13</sup>C (75 MHz,

DMSO- $d_6$ ):  $\delta$  165.94, 156.67, 148.62, 142.64, 130.69, 127.69, 121.16, 115.87, 110.63; MS (EI): 249.18 (m/z).

**Entry f, Table 2a:** Yellow solid; M.P. 291-293 °C; IR (KBr) : 3175, 1689, 1585, 1483, 1400, 1330, 1225, 1167, 1077, 916  $\text{cm}^{-1}$ ;  $^1\text{H-NMR}$  (300 MHz, DMSO- $d_6$ ) :  $\delta$  10.64 (s, 1H, -NH,  $\text{D}_2\text{O}$  exchangeable), 10.07 (s, 1H, -NH,  $\text{D}_2\text{O}$  exchangeable), 7.78 (s, 1H), 6.92- 6.97 (s, 1H, s, 2-NH,  $\text{D}_2\text{O}$  exchangeable), 2.24 (s, 3H), 2.15 (s, 3H);  $^{13}\text{C}$  NMR (75 MHz, DMSO- $d_6$ ):  $\delta$  165.91, 156.58, 139.51, 134.07, 133.80, 131.00, 123.58, 119.72, 115.86, 20.84, 16.45; MS (EI): 232.23 (m/z).

**Entry g, Table 2a:** Yellow solid; M.P. 267-269 °C; IR (KBr) : 3498, 3451, 3322, 3270, 1687, 1573, 1475, 1336, 1191, 1091, 973  $\text{cm}^{-1}$ ;  $^1\text{H-NMR}$  (300 MHz, DMSO- $d_6$ ) :  $\delta$  10.54 (s, 2H, -NH,  $\text{D}_2\text{O}$  exchangeable), 8.38 (s, 2H, -NH,  $\text{D}_2\text{O}$  exchangeable), 7.53-7.55 (d, 2H,  $J = 6\text{Hz}$ ), 6.99-7.12 (s, 2H, s, 4-NH,  $\text{D}_2\text{O}$  exchangeable), 3.78 (s, 4H), 1.92 (s, 2H);  $^{13}\text{C}$  NMR (75 MHz, DMSO- $d_6$ ):  $\delta$  163.88, 156.42, 142.41, 133.98, 130.80, 127.66, 117.17, 114.67, 111.47, 33.77, 25.55; MS (EI): 606.22 (m/z).

**Entry h, Table 2b:** Yellow solid. M.P. 250-252 °C; IR (KBr) : 3268, 3170, 1673, 1595, 1500, 1465, 1349, 1302, 1256, 1150, 1063  $\text{cm}^{-1}$ ;  $^1\text{H-NMR}$  (300 MHz, DMSO- $d_6$ ) :  $\delta$  12.47 (s, 1H, -NH,  $\text{D}_2\text{O}$  exchangeable), 11.21 (s, 1H, -NH,  $\text{D}_2\text{O}$  exchangeable), 9.04 (s, 1H, -NH,  $\text{D}_2\text{O}$  exchangeable) 8.69 (s, 1H, -NH,  $\text{D}_2\text{O}$  exchangeable) 7.64-7.66 (d, 1H,  $J = 6\text{ Hz}$ ), 7.32-7.37 (td, 1H,  $J = 1.2, 7.8\text{Hz}$ ), 7.06-7.11 (t, 1H,  $J = 15\text{Hz}$ ), 6.91-6.94 (d, 1H,  $J = 9\text{Hz}$ );  $^{13}\text{C}$  NMR (75 MHz, DMSO- $d_6$ ) :  $\delta$  179.15, 163.09, 142.80, 132.51, 131.73, 122.84, 121.42, 120.43, 111.50; MS (EI): 220.25 (m/z).

**Entry i Table 2b:** Yellow solid. M.P. 268-270 °C; IR (KBr): 3423, 3327, 3167, 1696, 1607, 1491, 1462, 1310, 1204, 1143  $\text{cm}^{-1}$ ;  $^1\text{H-NMR}$  (300 MHz, DMSO- $d_6$ ):  $\delta$  12.28 (s, 1H, -NH,  $\text{D}_2\text{O}$  exchangeable), 11.29 (s, 1H, -NH,  $\text{D}_2\text{O}$  exchangeable), 9.11 (s, 1H, -NH,  $\text{D}_2\text{O}$  exchangeable), 8.82 (s, 1H, -NH,  $\text{D}_2\text{O}$  exchangeable), 7.87 (s, 1H), 7.48-7.51 (d, 1H,  $J = 9\text{Hz}$ ) 6.86-6.89 (d, 1H,  $J = 9\text{Hz}$ );  $^{13}\text{C}$  NMR (75 MHz, DMSO- $d_6$ ):  $\delta$  179.23, 162.70, 141.81, 133.65, 131.10, 123.92, 122.78, 114.62, 113.41; MS (EI): 299.14 (m/z), 301 (M+2).

**Entry j, Table 2b:** Yellow solid; M.P. 280-282 °C ; IR (KBr): 3427, 3321, 3221, 3163, 1697, 1608, 1573, 1491, 1467, 1203, 1142, 854, 812 cm<sup>-1</sup>; <sup>1</sup>H-NMR (300 MHz, DMSO-d<sub>6</sub>): δ 12.30 (s, 1H, -NH, D<sub>2</sub>O exchangeable), 11.29 (s, 1H, -NH, D<sub>2</sub>O exchangeable), 9.11(s, 1H, -NH, D<sub>2</sub>O exchangeable), 8.81 (s, 1H, -NH, D<sub>2</sub>O exchangeable), 7.74-7.75 (d, 1H, *J* = 3Hz), 7.36-7.39 (dd, 1H, *J* = 8.4, 8.4Hz), 6.92-6.94 (d, 1H, *J* = 6Hz); <sup>13</sup>C NMR (75 MHz, DMSO-d<sub>6</sub>): δ 179.24, 162.86, 141.44, 131.26, 130.90, 126.98, 122.38, 121.11, 112.98; MS (EI): 254.69 (m/z).

**Entry k, Table 2b:** Yellow solid; M.P. 266-268 °C; IR (KBr): 3446, 3316, 3160, 3139, 3116, 1687, 1571, 1465, 1434, 1280, 1201, 1133, 1078, 887, 846, 821, 763 cm<sup>-1</sup>; <sup>1</sup>H-NMR (300 MHz, DMSO-d<sub>6</sub>): δ 12.29 (s, 1H, -NH, D<sub>2</sub>O exchangeable), 11.28 (s, 1H, -NH, D<sub>2</sub>O exchangeable), 9.08 (s, 1H, -NH, D<sub>2</sub>O exchangeable), 8.82 (s, 1H, -NH, D<sub>2</sub>O exchangeable), 8.031-8.036 (d, 1H, *J* = 1.5Hz), 7.64-7.67 (dd, 1H, *J* = 8.4, 8.1Hz), 6.76-6.78 (d, 1H, *J* = 6Hz); <sup>13</sup>C NMR (75 MHz, DMSO-d<sub>6</sub>): δ 179.51, 162.34, 142.07, 139.17, 130.74, 129.52, 122.62, 113.44, 85.03; MS (EI): 346.14 (m/z).

**Entry l, Table 2b:** Yellow solid; M.P. >300 °C; IR (KBr): 3376, 3278, 3195, 3068, 1697, 1610, 1516, 1459, 1337, 1298, 1135, 1091, 1048, 917 cm<sup>-1</sup>; <sup>1</sup>H-NMR (300 MHz, DMSO-d<sub>6</sub>): δ 12.20 (s, 1H, -NH, D<sub>2</sub>O exchangeable), 11.78 (s, 1H, -NH, D<sub>2</sub>O exchangeable), 9.18 (s, 1H, -NH, D<sub>2</sub>O exchangeable), 9.02 (s, 1H, -NH, D<sub>2</sub>O exchangeable), 8.57-8.58 (d, 1H, *J* = 3Hz), 8.224-8.261 (dd, 1H, *J* = 8.7, 8.7 Hz ), 7.07-7.10 (d, 1H, *J* = 9Hz), <sup>13</sup>C NMR (75 MHz, DMSO-d<sub>6</sub>): δ 179.25, 163.38, 147.82, 143.20, 130.45, 127.35, 121.45, 116.89, 111.61; MS (EI): 265.24 (m/z).

**Entry m, Table 2b:** Brown solid; M.P. 279-280 °C; IR (KBr): 3504, 3376, 3252, 3167, 1678, 1616, 1577, 1481, 1304, 1252, 1206, 1135, 1098, 1042, 851 cm<sup>-1</sup>; <sup>1</sup>H-NMR (300 MHz, DMSO-d<sub>6</sub>) δ 12.49 (s, 1H, -NH, D<sub>2</sub>O exchangeable), 11.15 (s, 1H, -NH, D<sub>2</sub>O exchangeable), 8.99 (s, 1H, -NH, D<sub>2</sub>O exchangeable), 8.63 (s, 1H, -NH, D<sub>2</sub>O exchangeable), 7.32 (s, 1H), 6.98 (s, 1H), 2.25 (s, 3H), 2.17 (s, 3H); <sup>13</sup>C NMR (75 MHz, DMSO-d<sub>6</sub>): δ 179.21, 163.54, 139.17, 133.43, 132.95, 131.65, 120.47, 120.00, 119.14, 20.99, 16.23; MS (EI): 248.30 (m/z).

**Entry n, Table 2b:** Yellow solid; M.P. 270 °C; IR (KBr): 3429, 3247, 3150, 1677, 1607, 1493, 1450, 1418, 1372, 1341, 1268, 1218, 1100, 1042, 893 cm<sup>-1</sup>; <sup>1</sup>H-NMR (300 MHz, DMSO-d<sub>6</sub>) δ 9.07 (s, 1H, -NH, D<sub>2</sub>O exchangeable), 8.72 (s, 1H, -NH, D<sub>2</sub>O exchangeable), 7.67-7.69 (d, 1H, *J*

= 6Hz), 7.41-7.46 (t, 1H,  $J = 15$  Hz), 7.12-7.17 (t, 2H,  $J = 15$ Hz), 3.20 (s, 3H);  $^{13}\text{C}$  NMR (75 MHz, DMSO- $d_6$ ):  $\delta$  183.92, 166.01, 148.82, 136.46, 136.40, 128.18, 125.82, 124.42, 115.04, 30.91; 234.27 (m/z).

**Entry o, Table 2b:** Brown solid, M.P. 269-271  $^{\circ}\text{C}$ ; IR (KBr): 3482, 3465, 3401, 3245, 3151, 1697, 1598, 1467, 1434, 1348, 1263, 1149, 1116, 1072, 902, 802  $\text{cm}^{-1}$ ;  $^1\text{H}$ -NMR (300 MHz, DMSO- $d_6$ )  $\delta$  12.16 (s, 2H, -NH,  $\text{D}_2\text{O}$  exchangeable), 9.06 (s, 2H, -NH,  $\text{D}_2\text{O}$  exchangeable), 8.72 (s, 2H, -NH,  $\text{D}_2\text{O}$  exchangeable), 7.862-7.868 (s, 2H,  $J = 1.8$ Hz), 7.452-7.486 (dd, 2H,  $J = 8.4$ , 8.4Hz), 7.08-7.10 (d, 2H,  $J = 6$ Hz), 3.81-3.85 (t, 4H,  $J = 12$ Hz), 2.01-2.06 (t, 2H,  $J = 15$  Hz);  $^{13}\text{C}$  NMR (75 MHz, DMSO- $d_6$ ):  $\delta$  179.25, 160.73, 141.76, 133.29, 129.77, 123.72, 121.98, 115.45, 112.24, 37.69, 25.21; MS (EI): 638.35 (m/z).

**Entry a, Table-2a:**

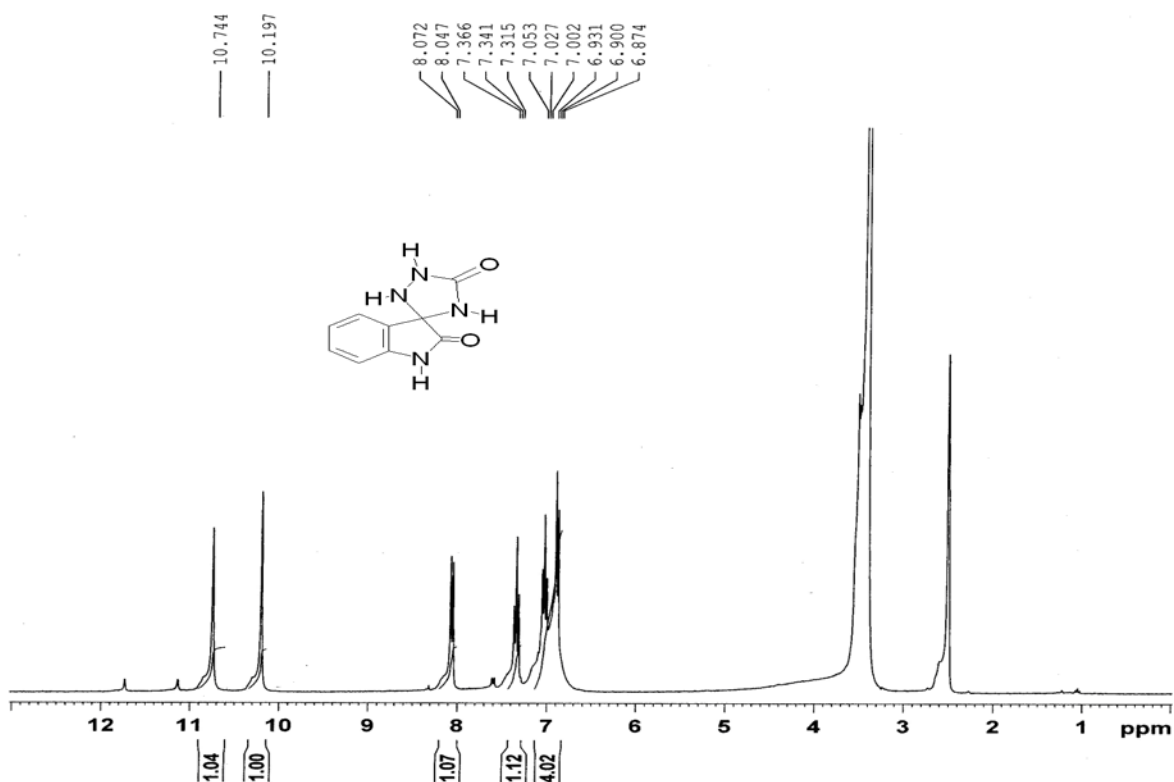

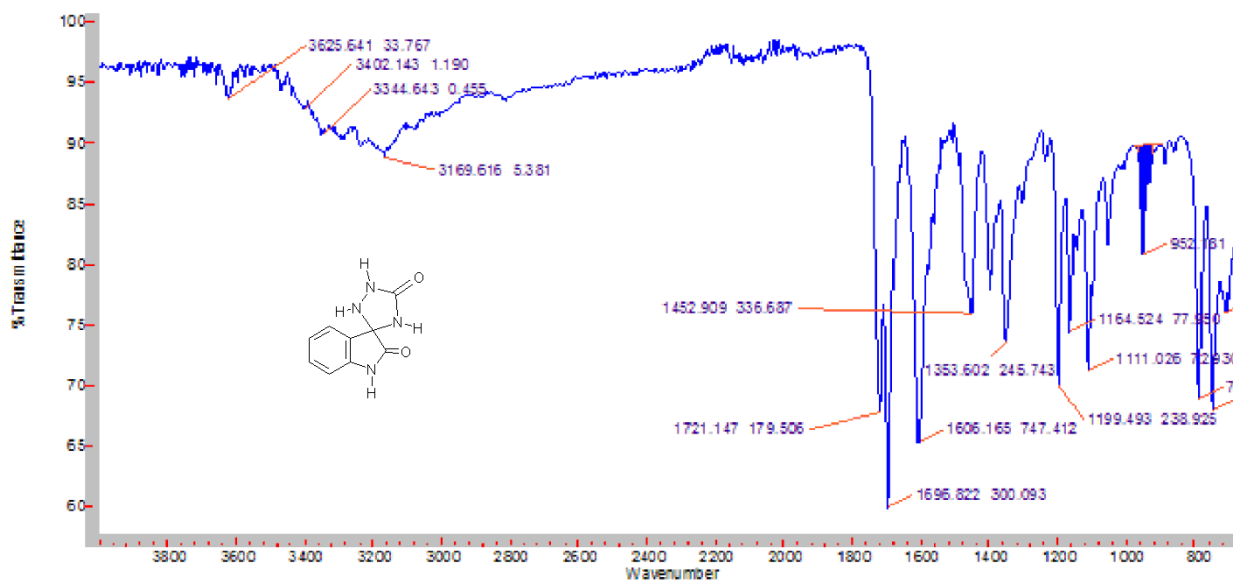

Entry b, Table 2a:

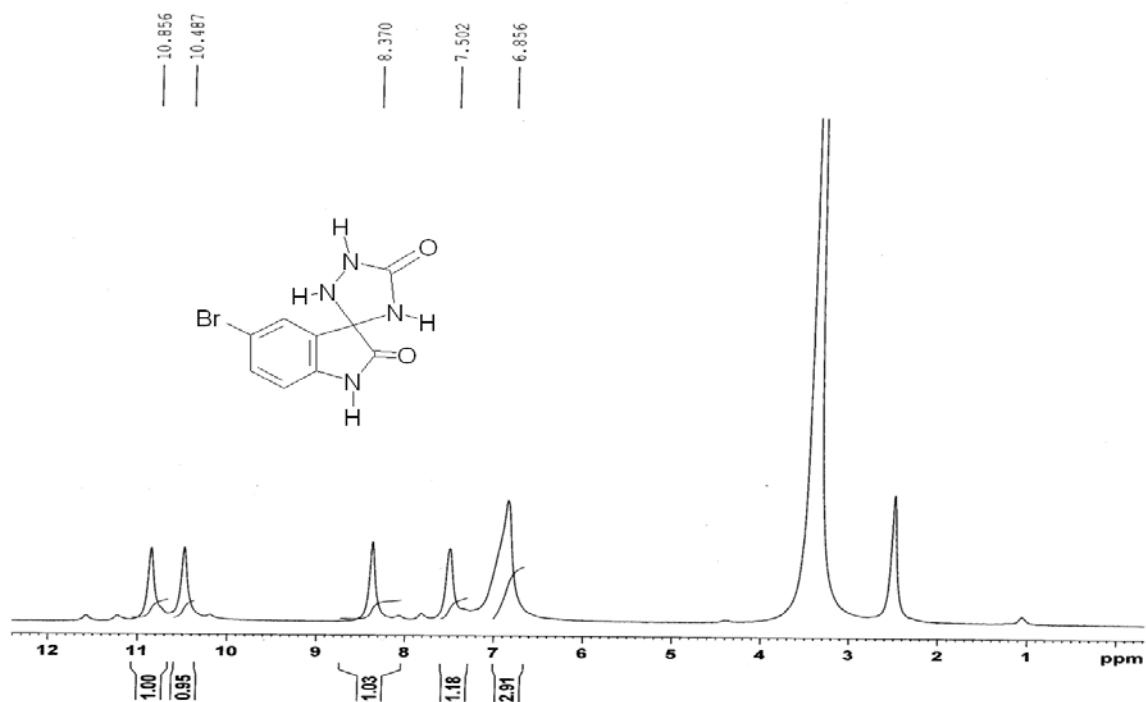



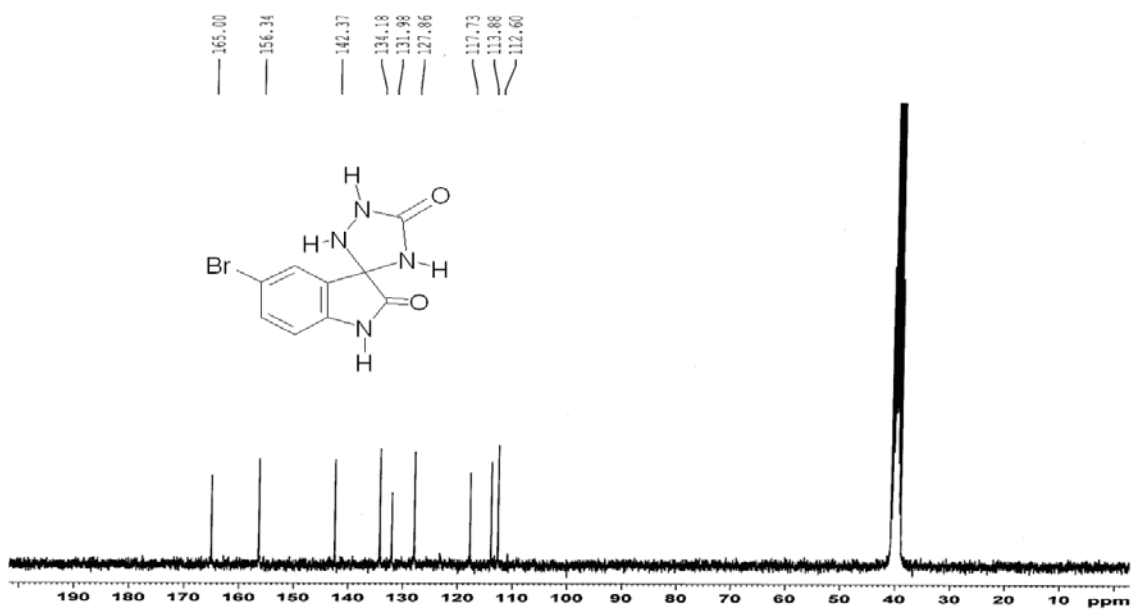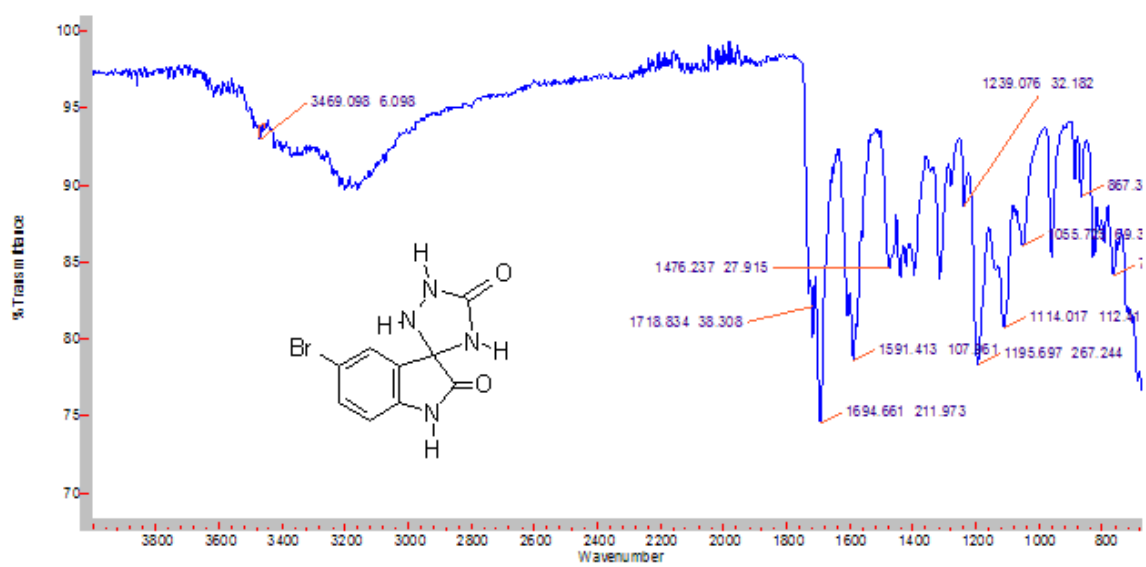

Entry c, Table 2a:

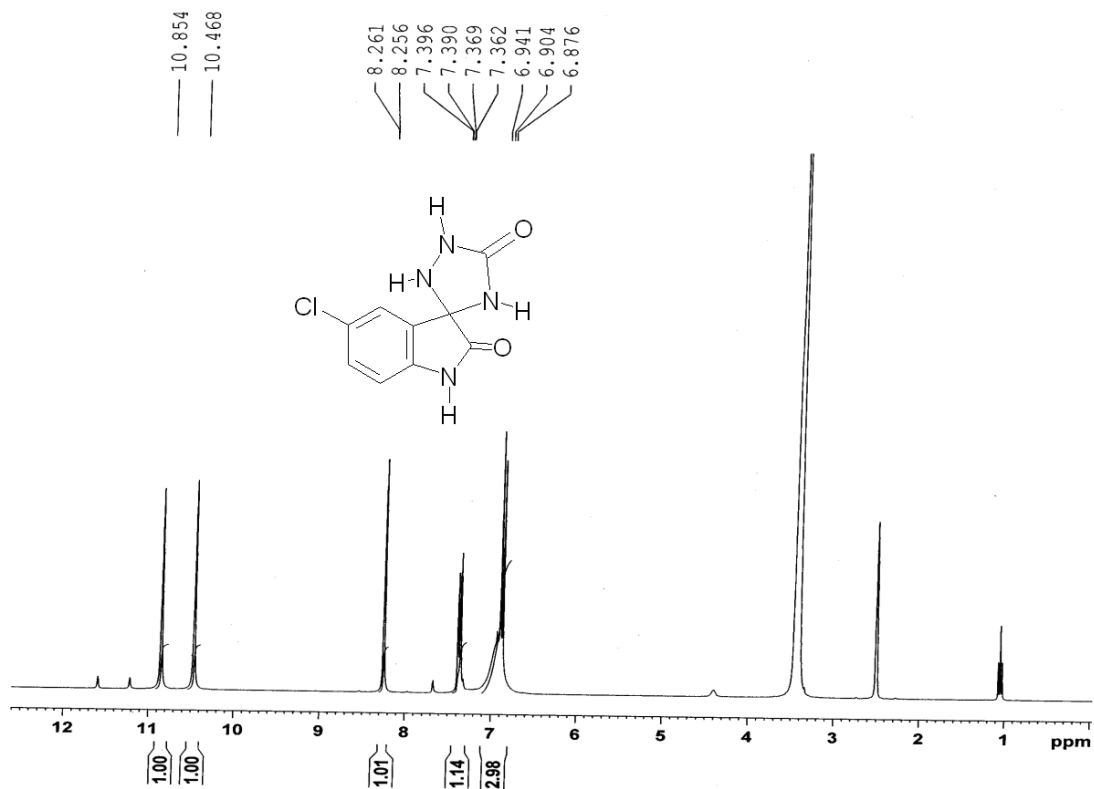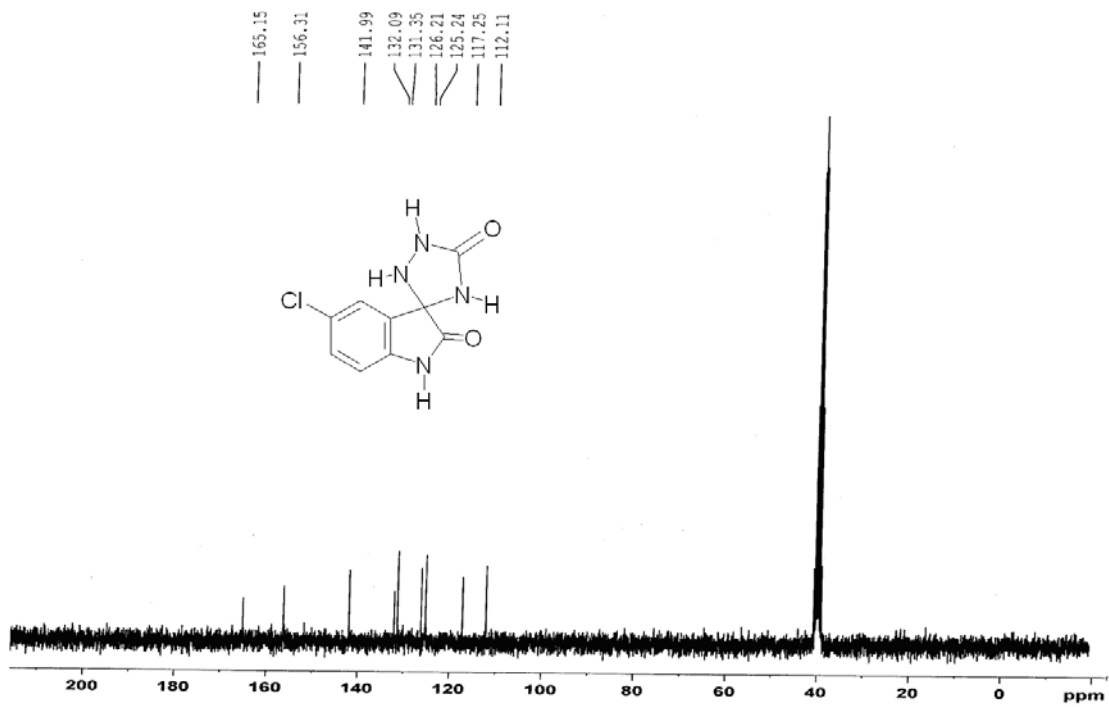



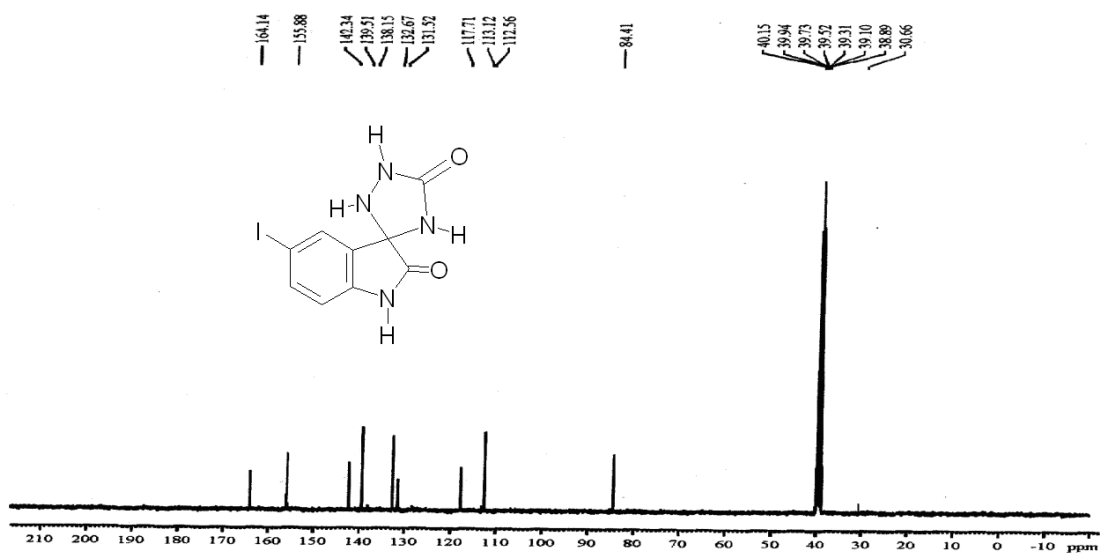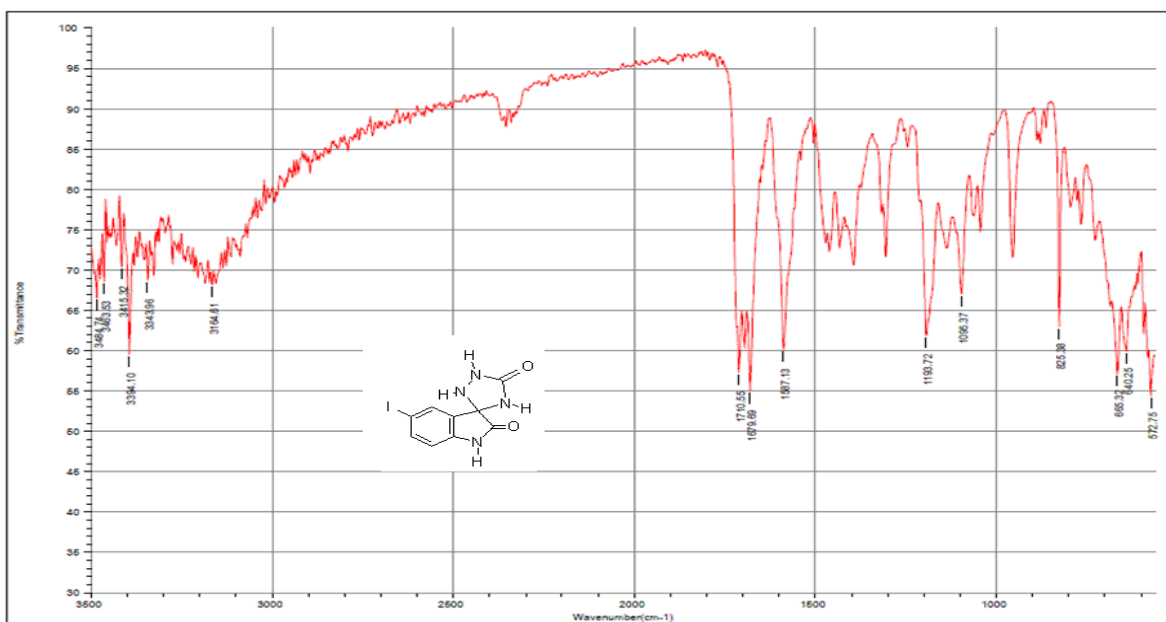

### Entry e, Table 2a

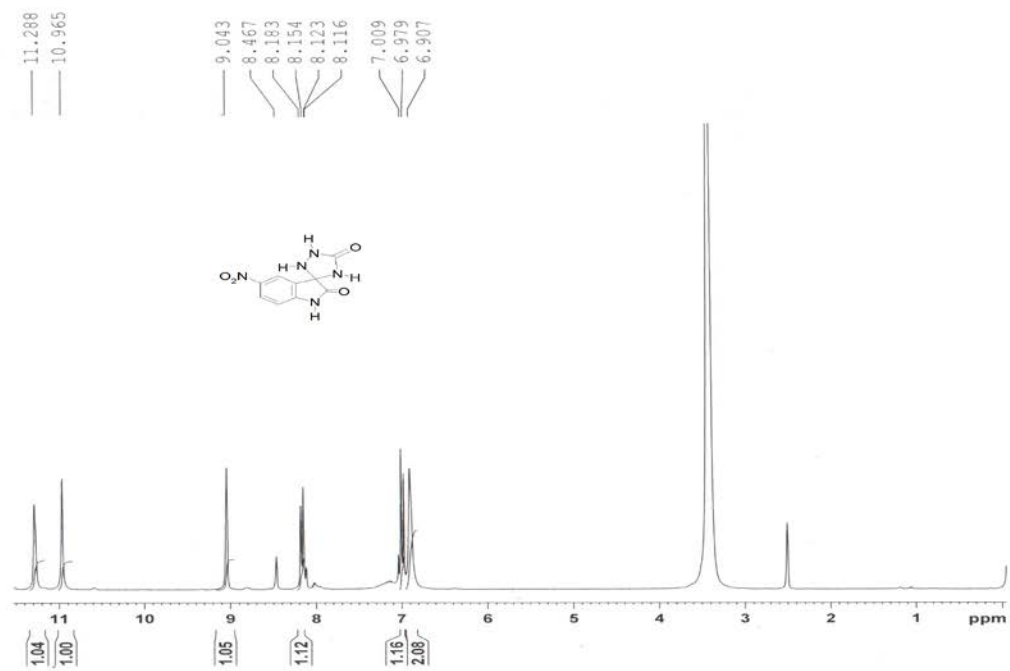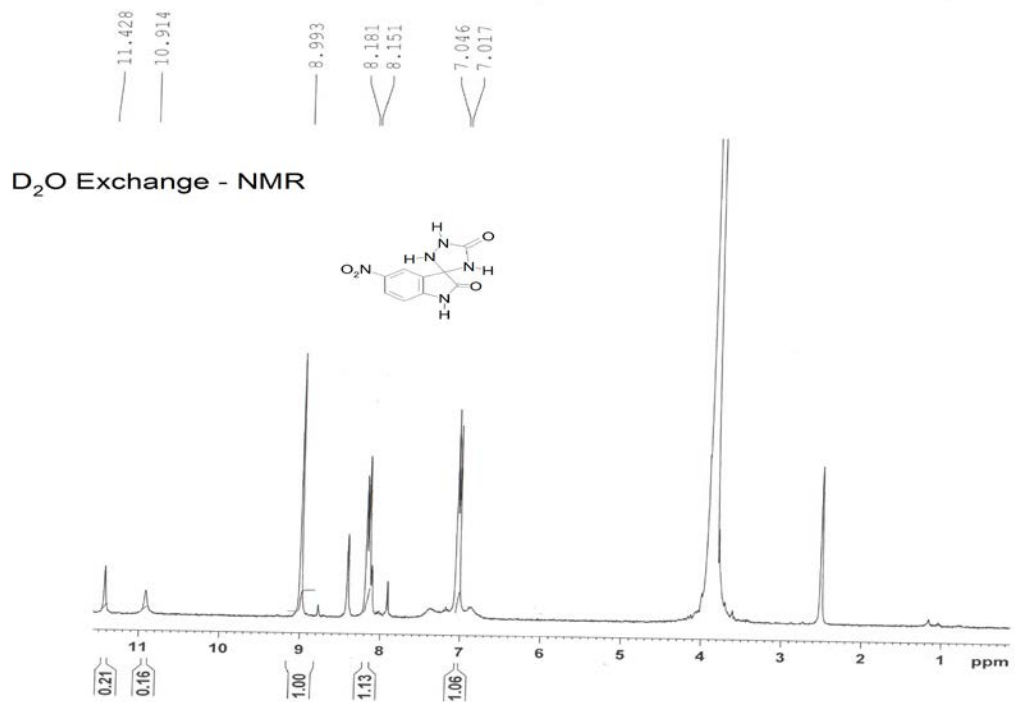

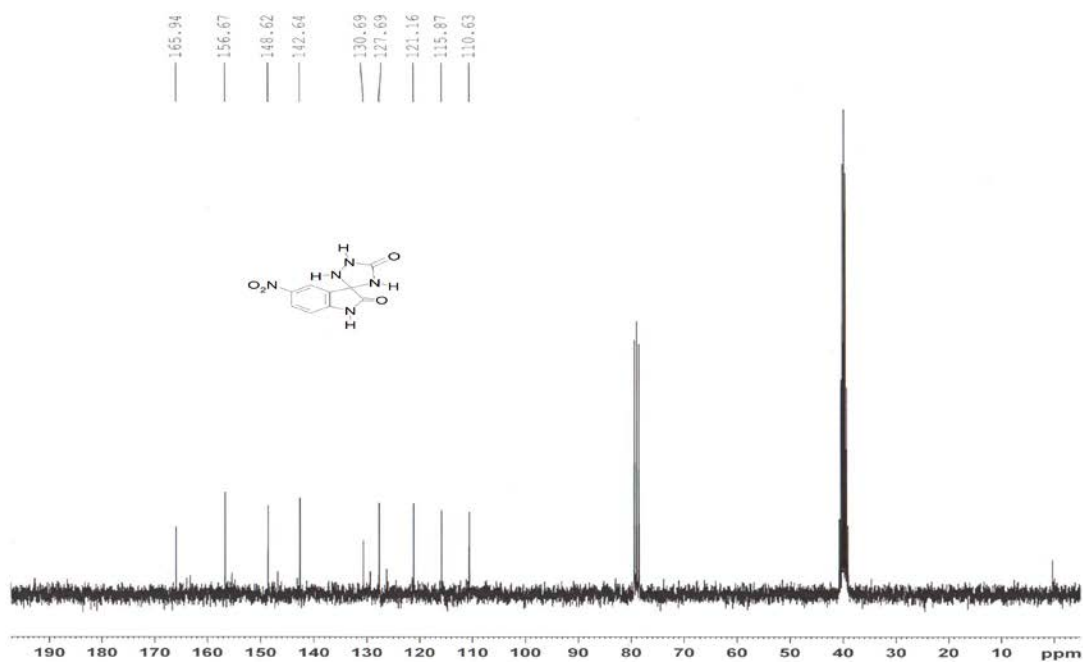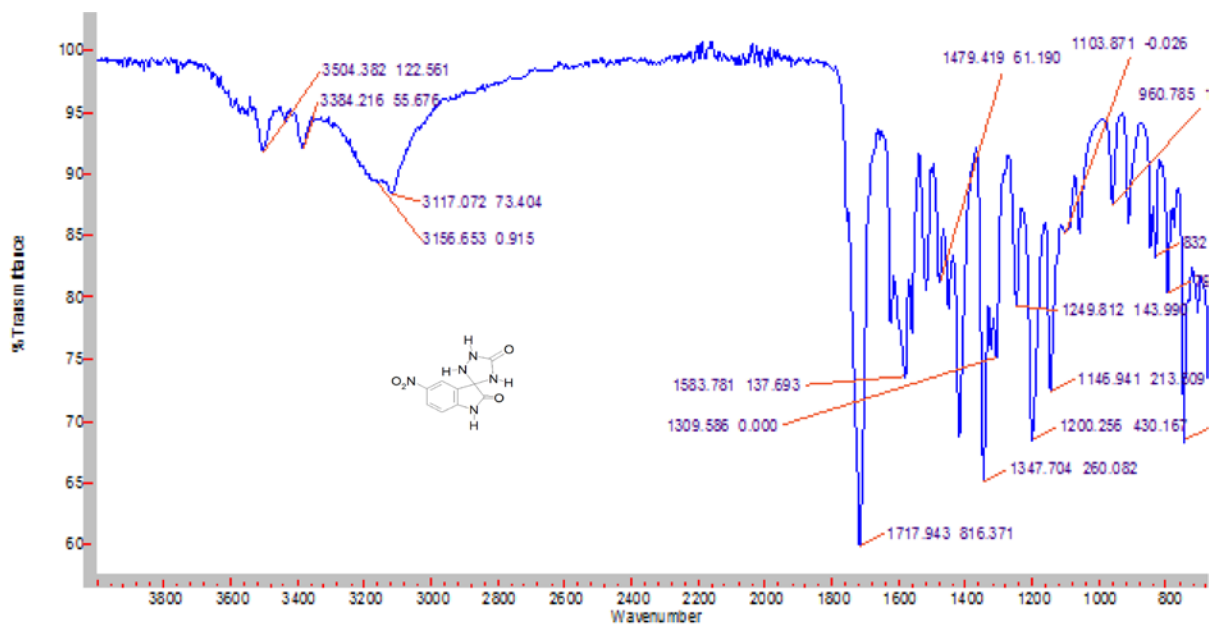

Entry f, Table 2a:

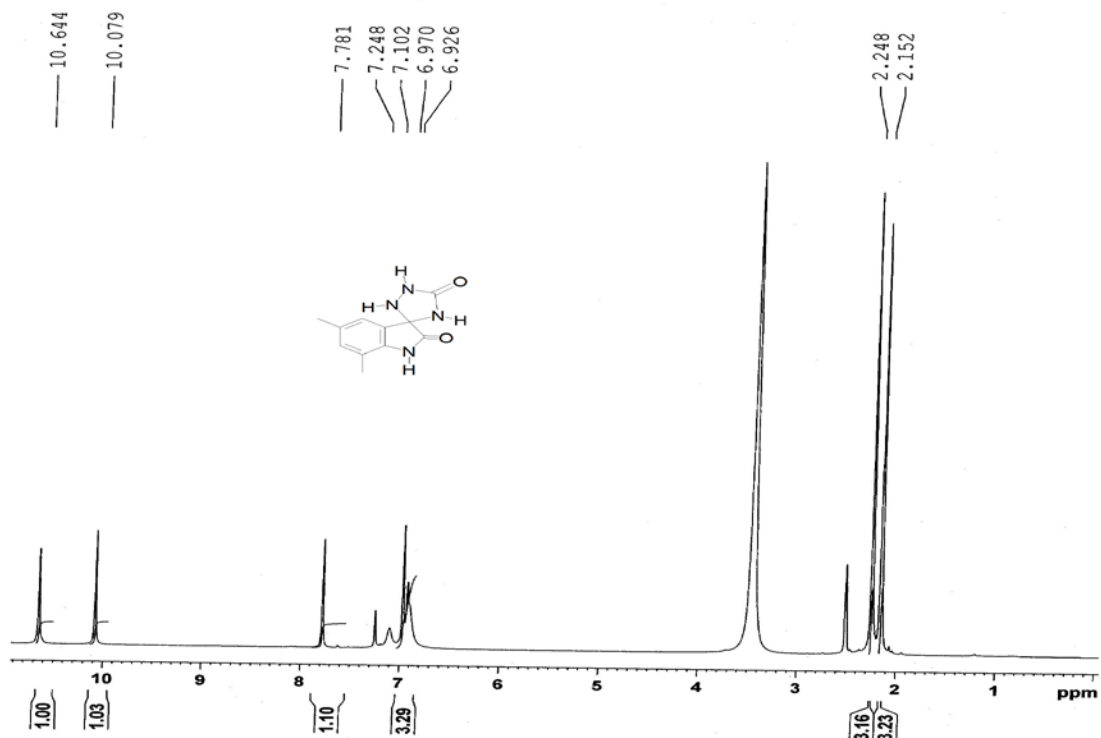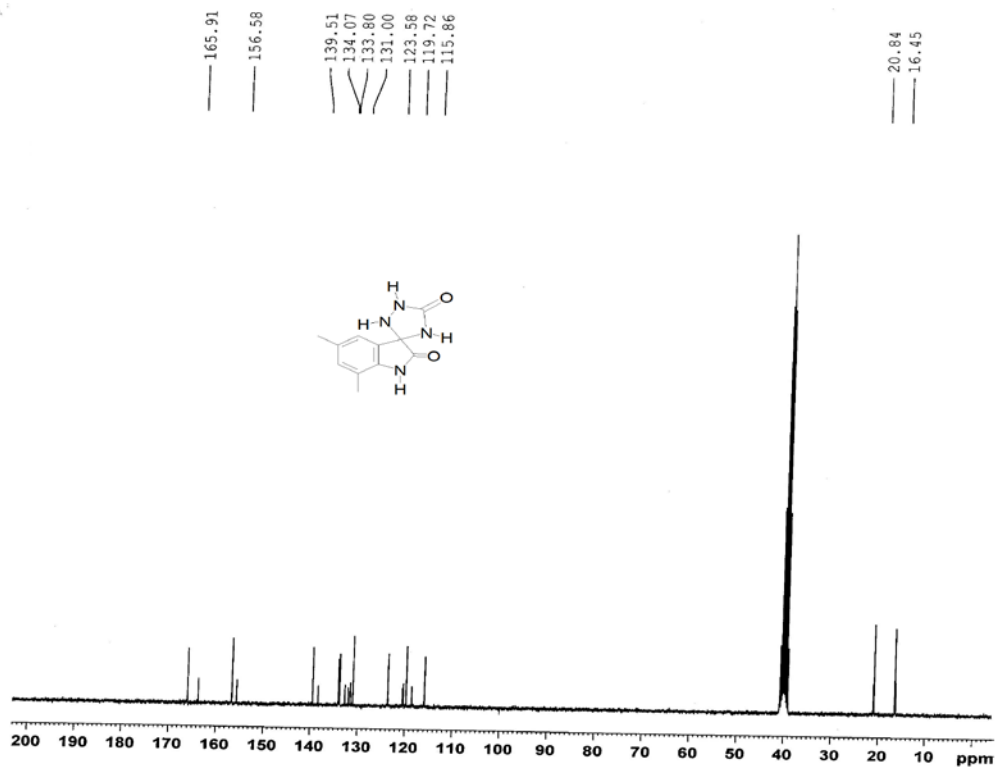

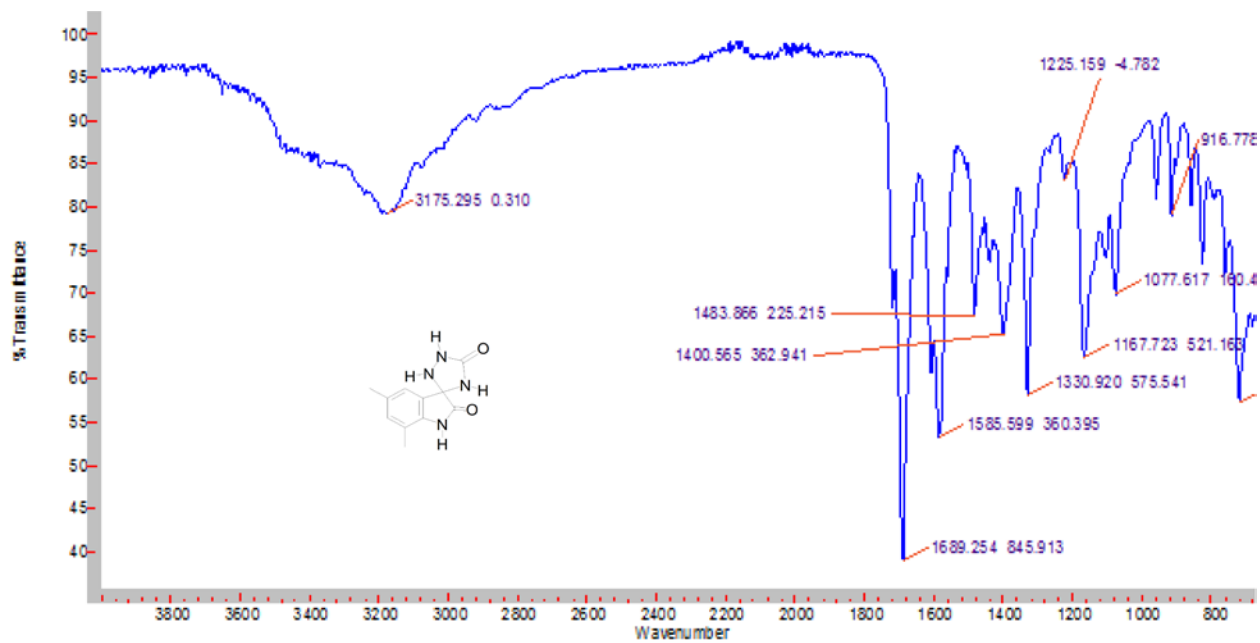

Entry g, Table 2a:

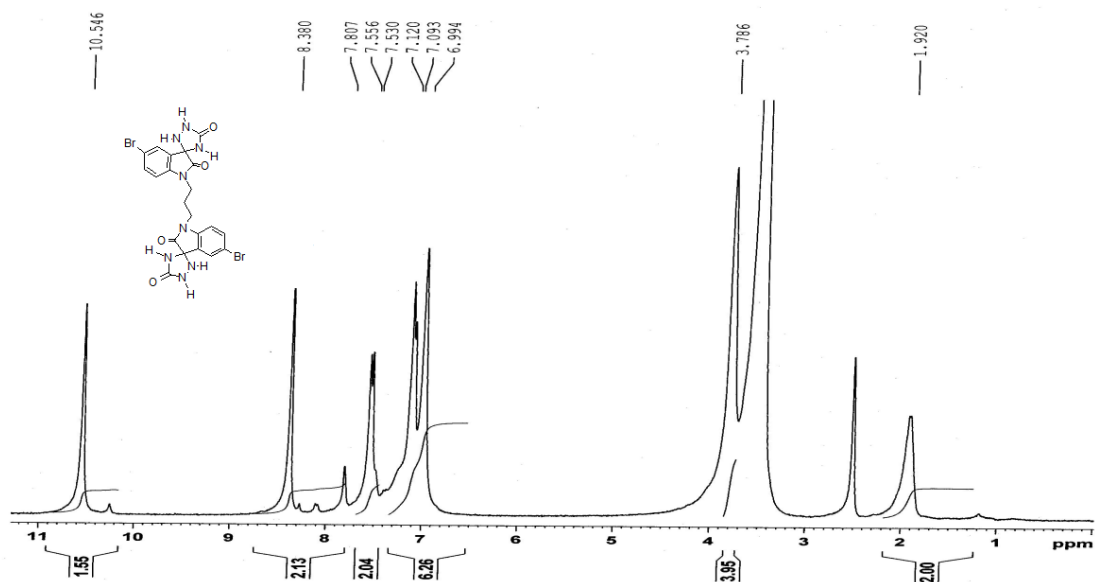



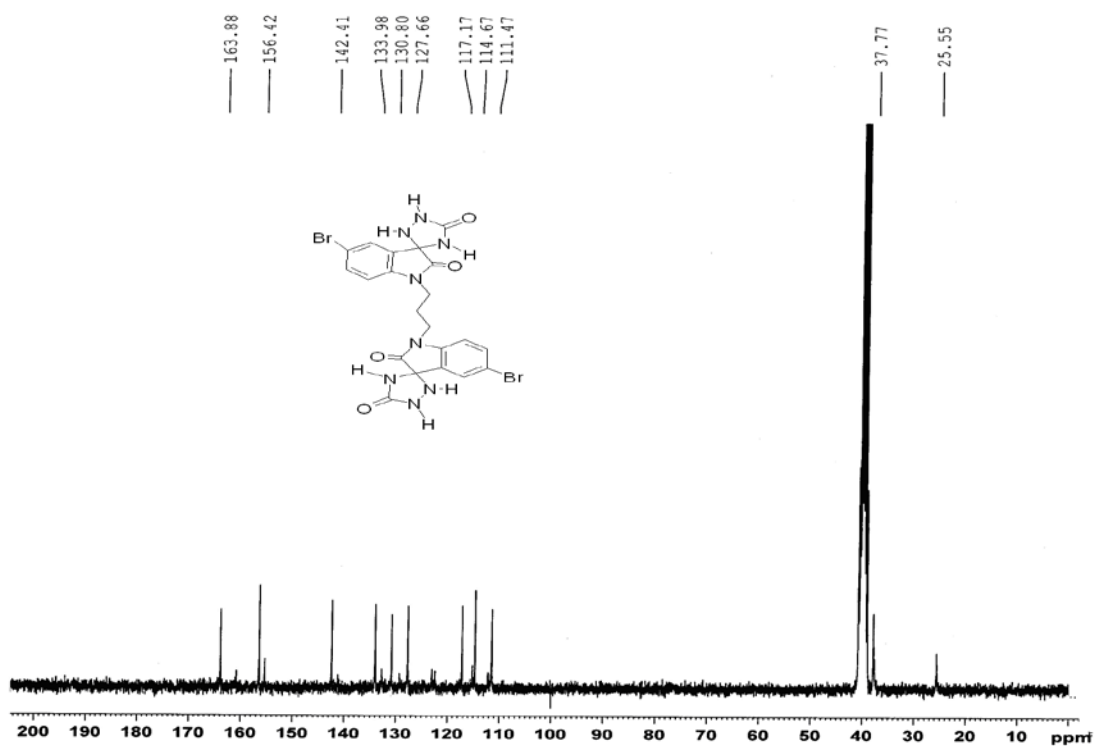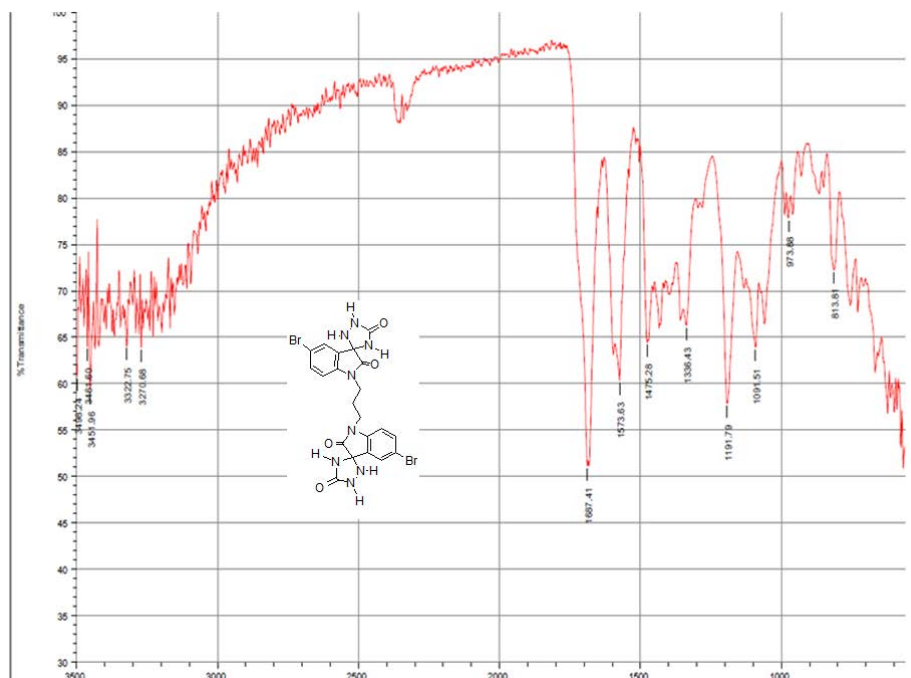

Entry h, Table 2b:

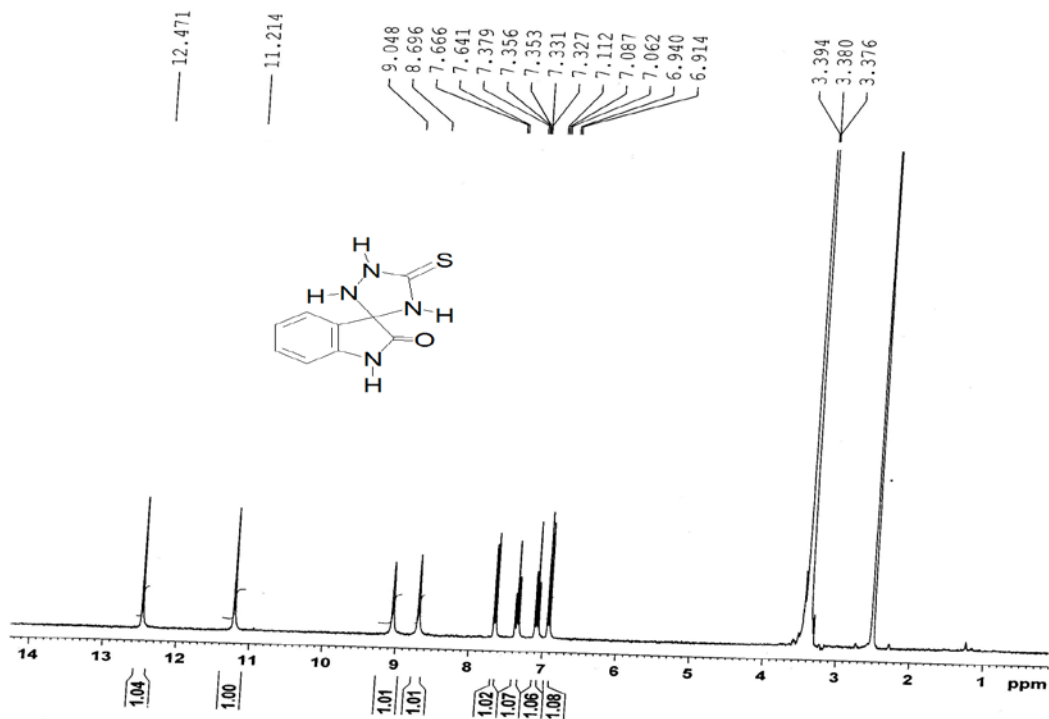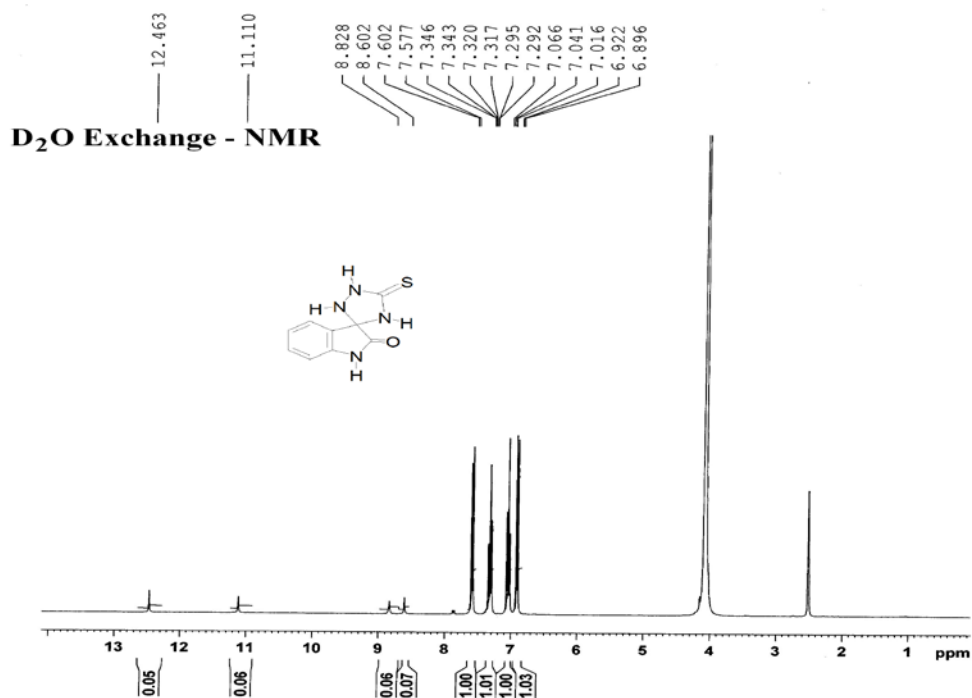

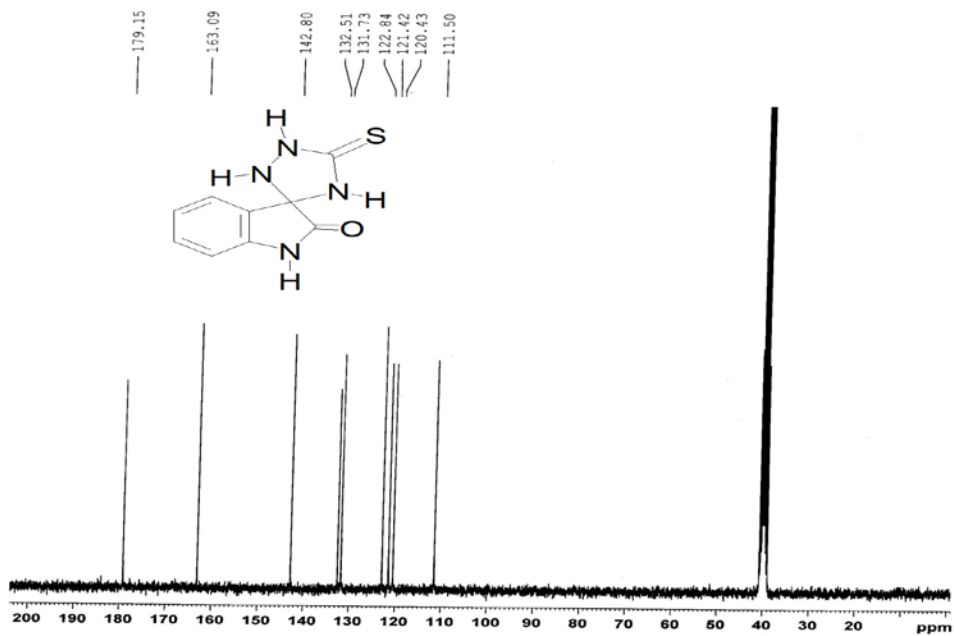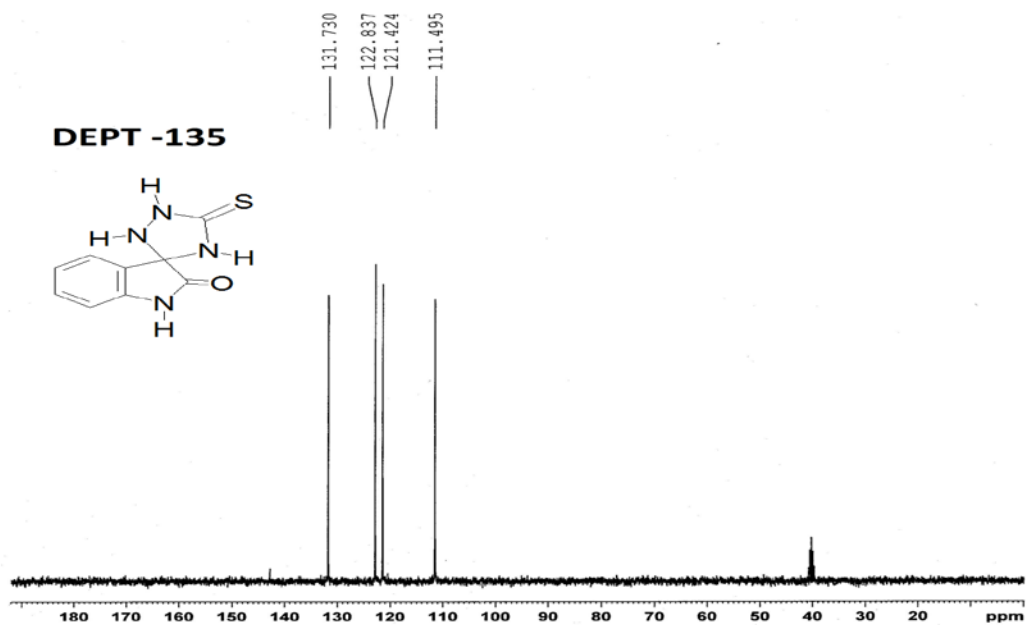

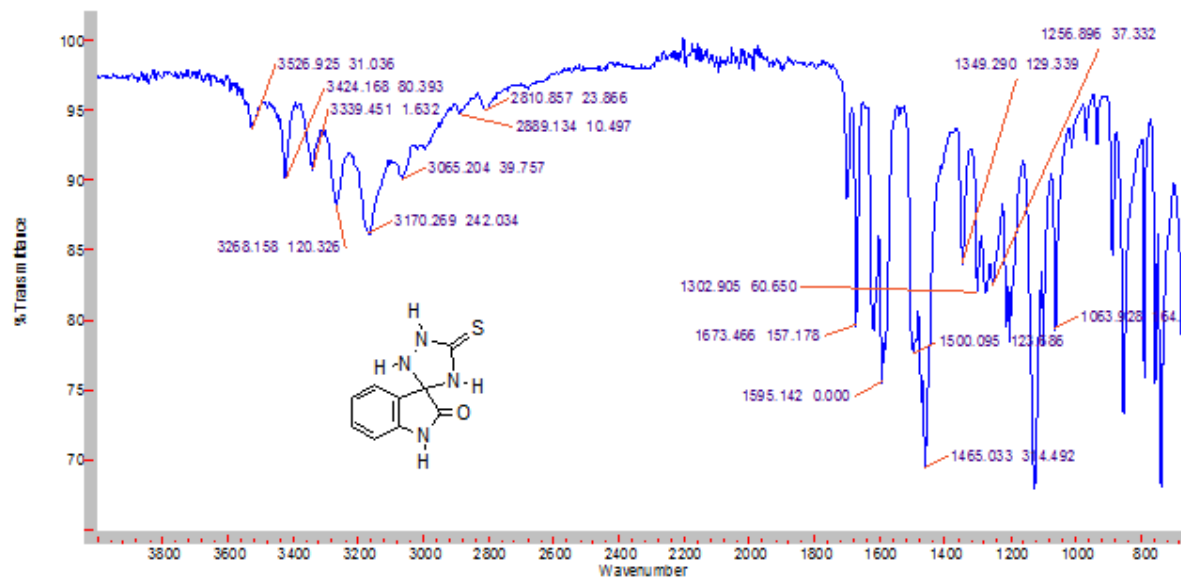

Entry i, Table 2a:

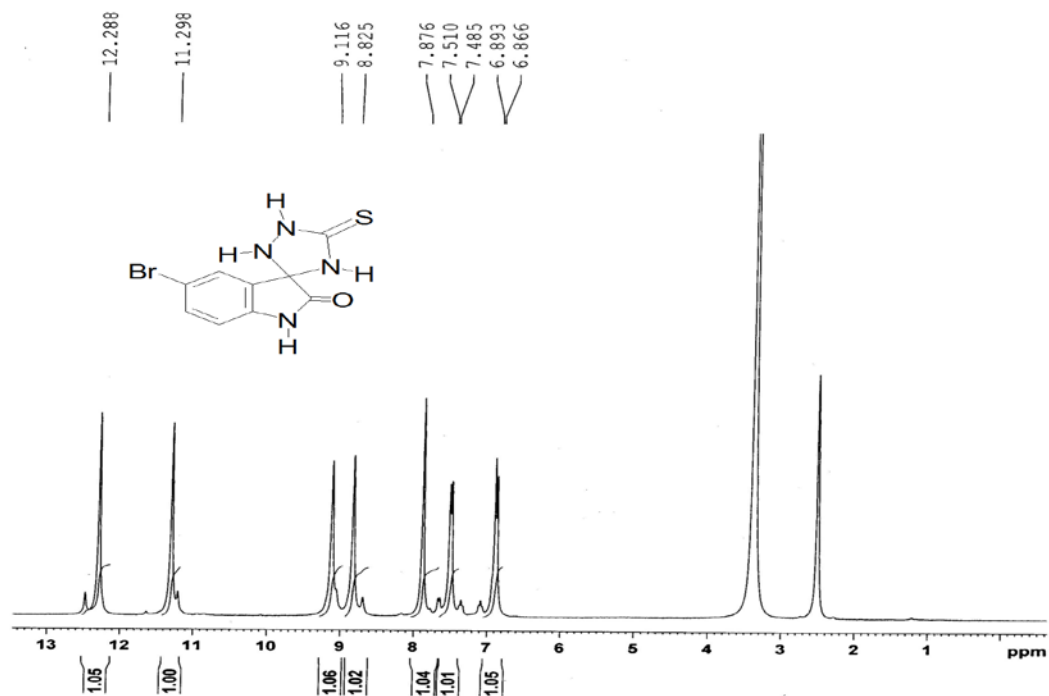

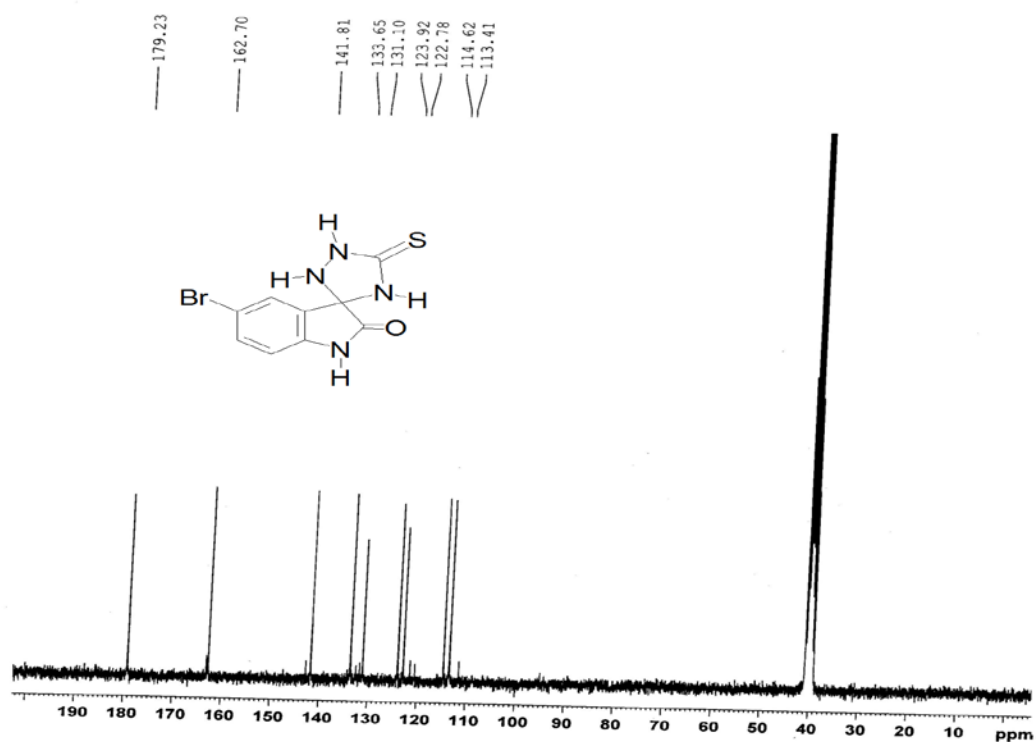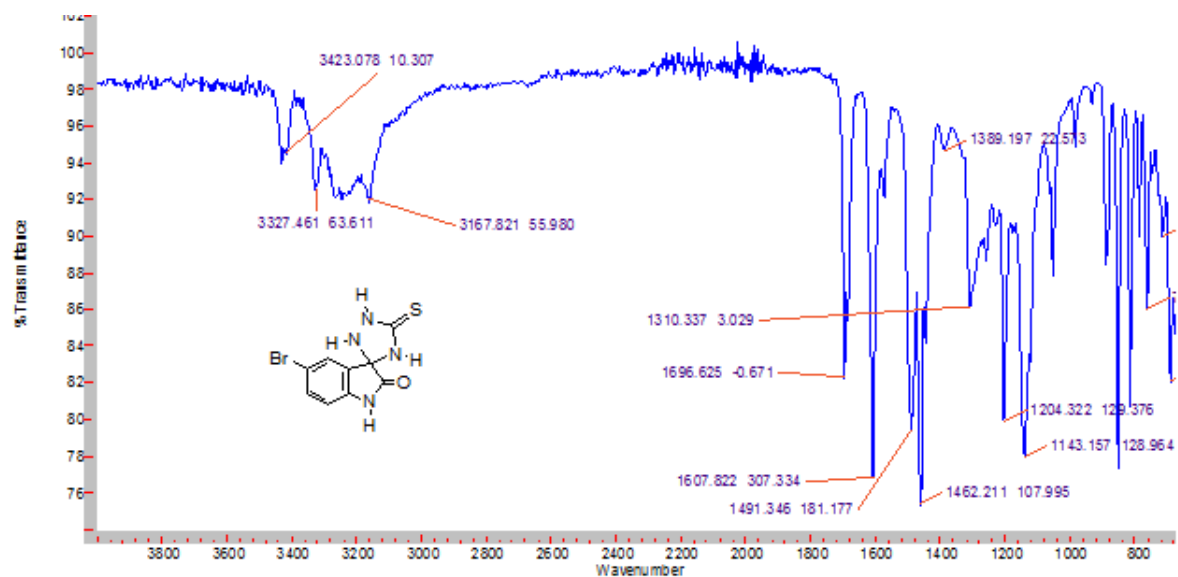

Entry j, Table 2b:

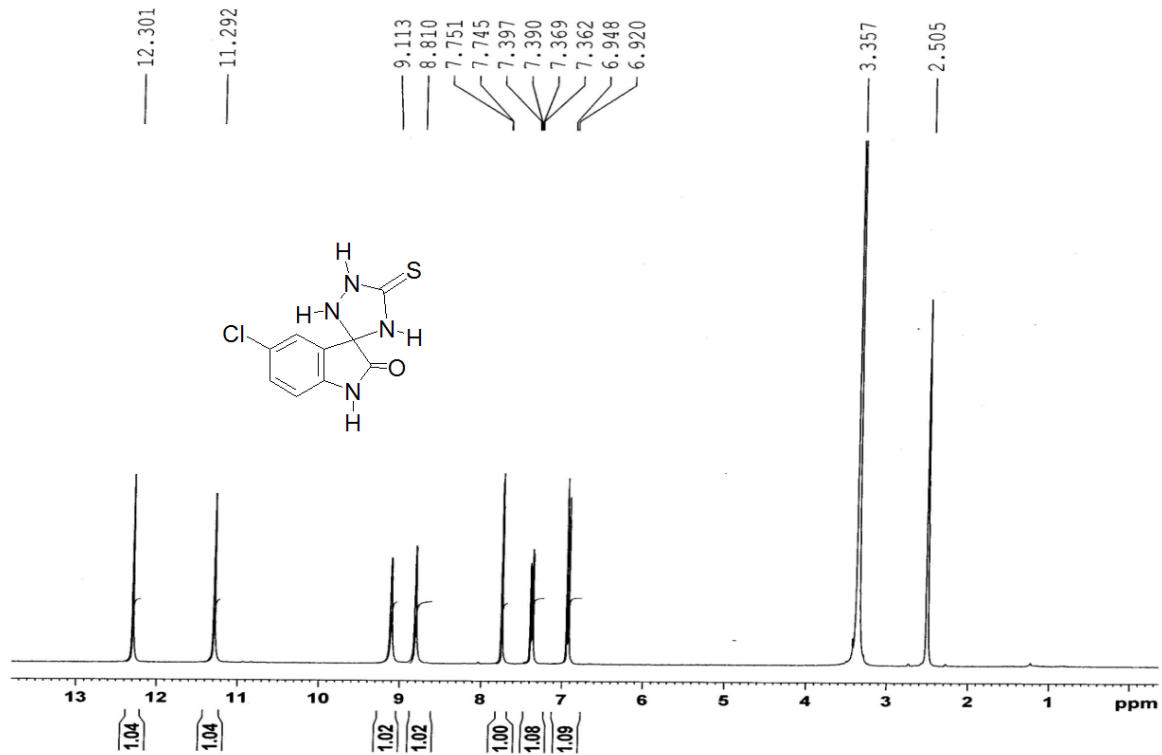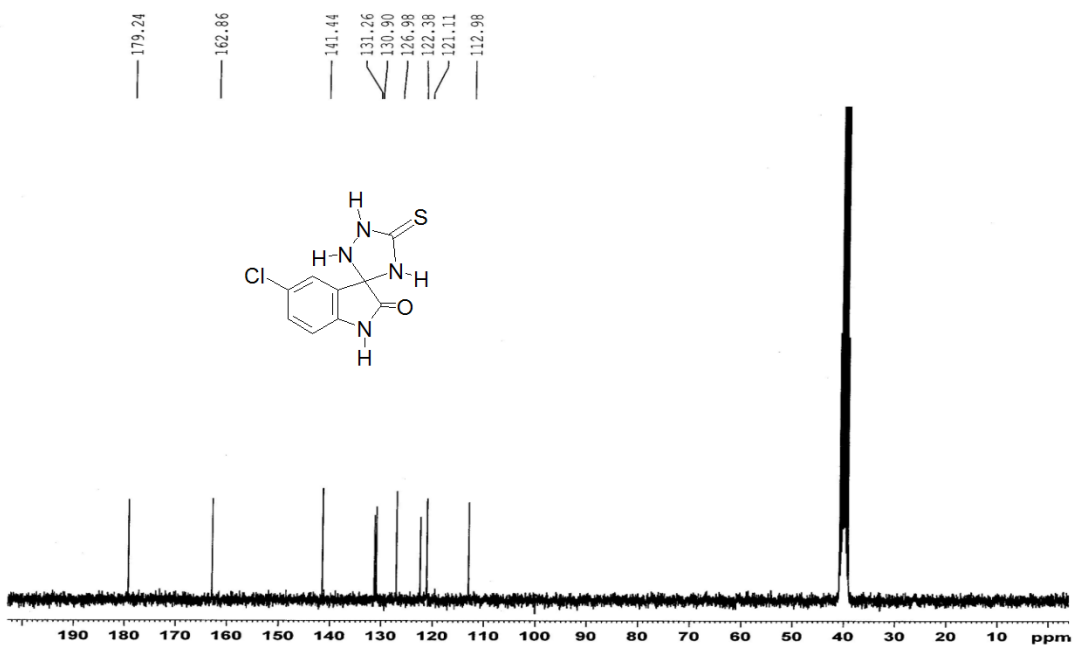

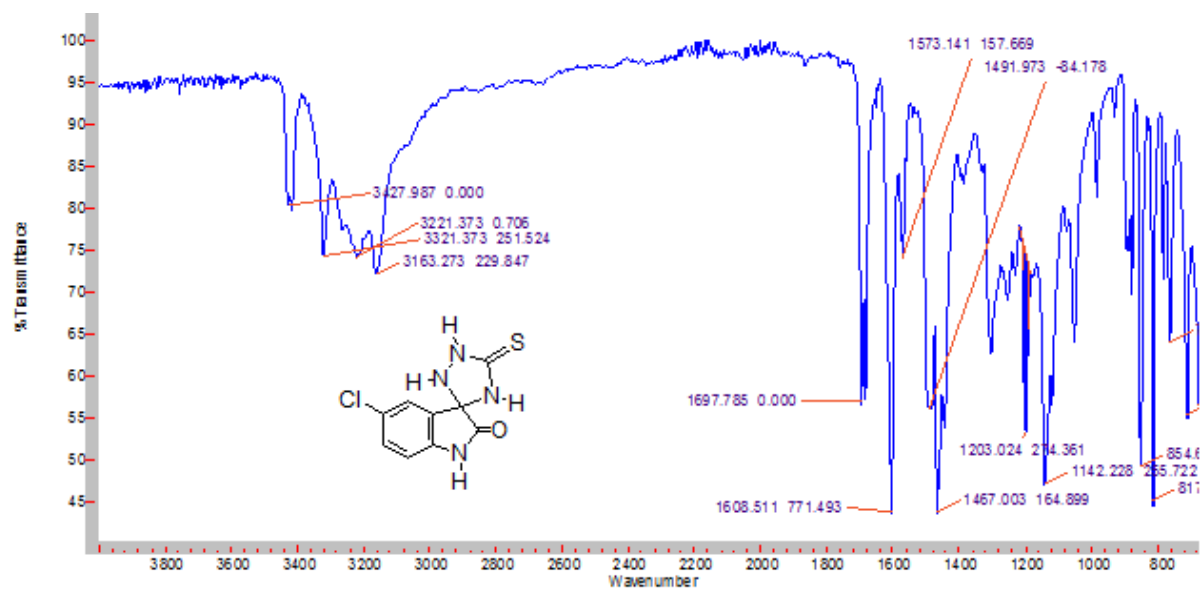

Entry k, Table 2b:

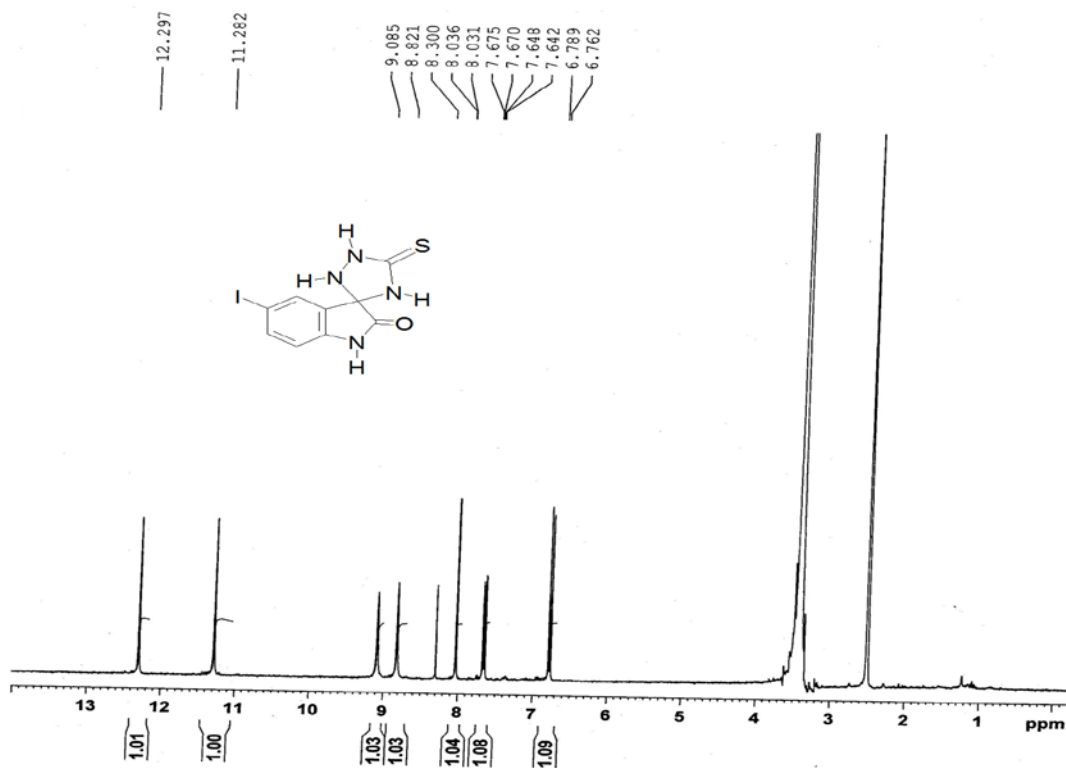

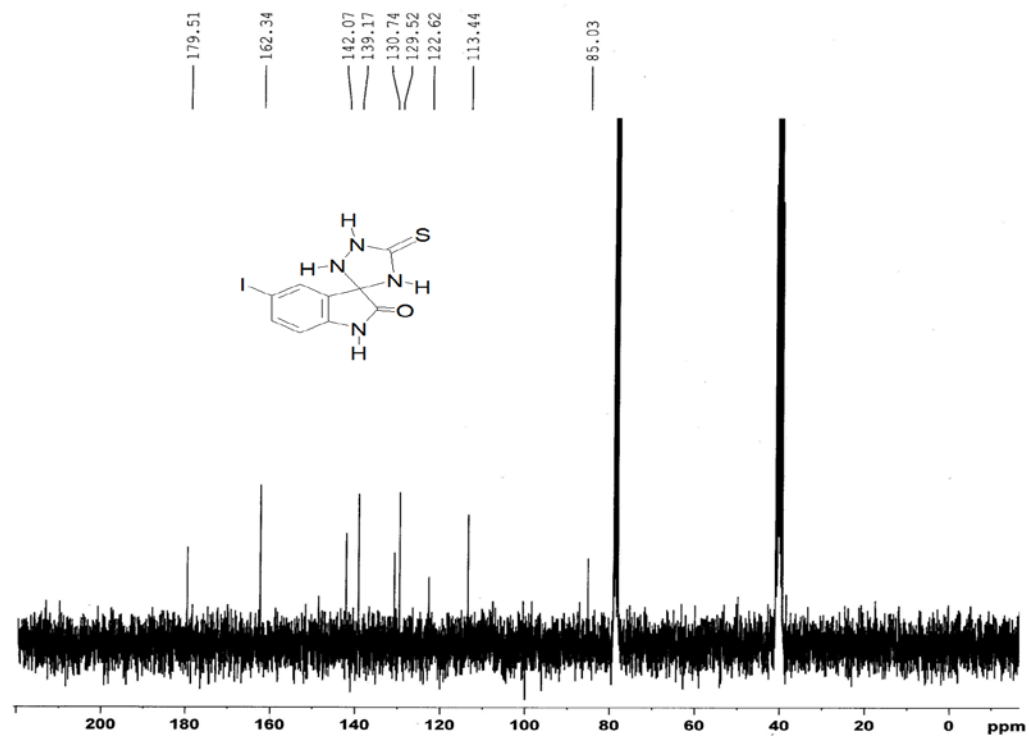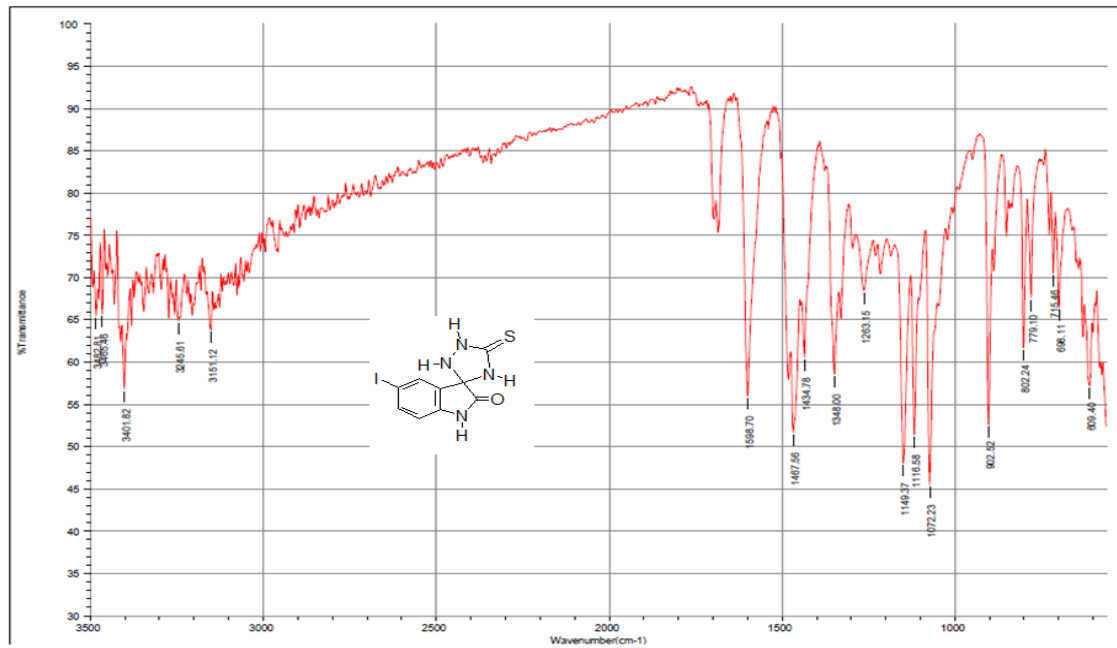



Entry 1, Table 2b:

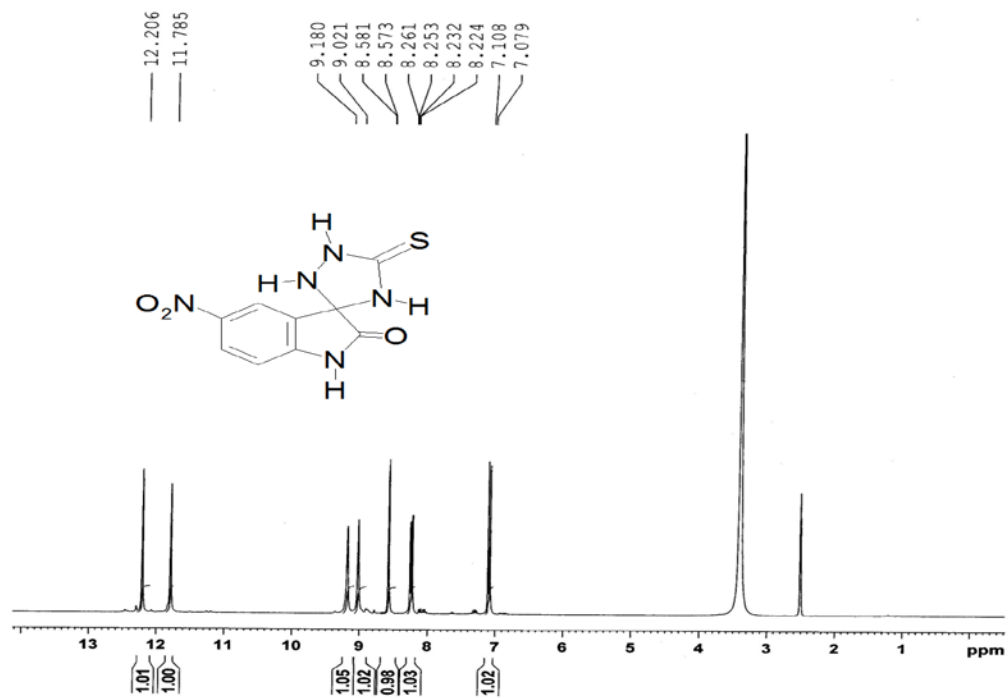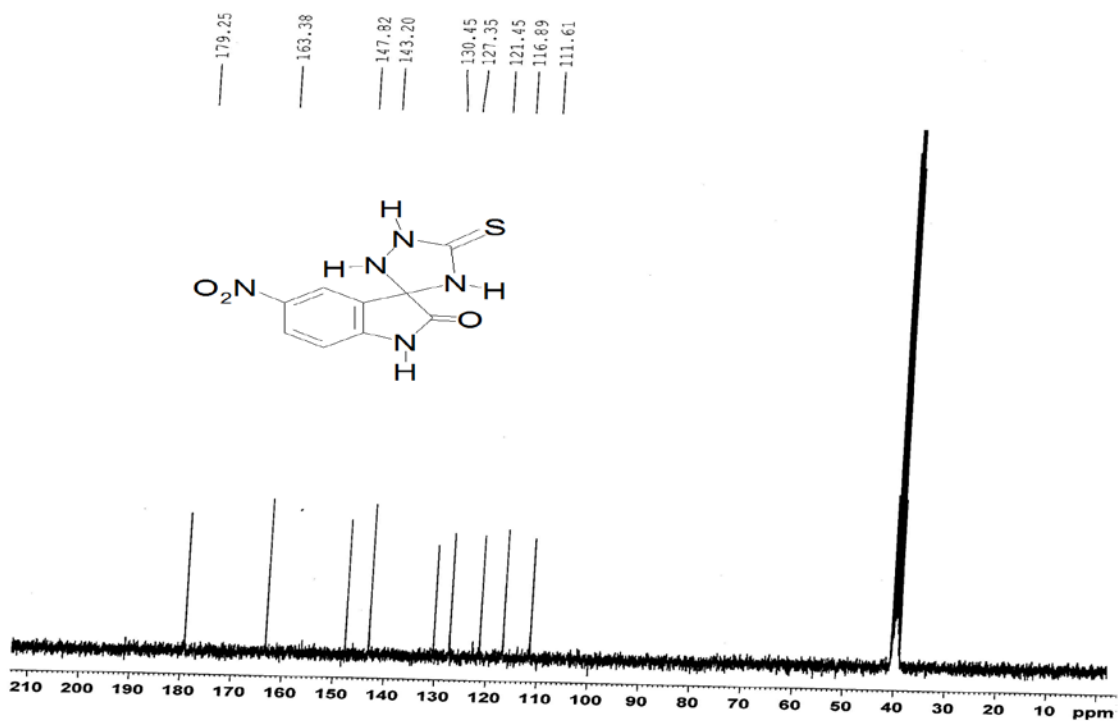

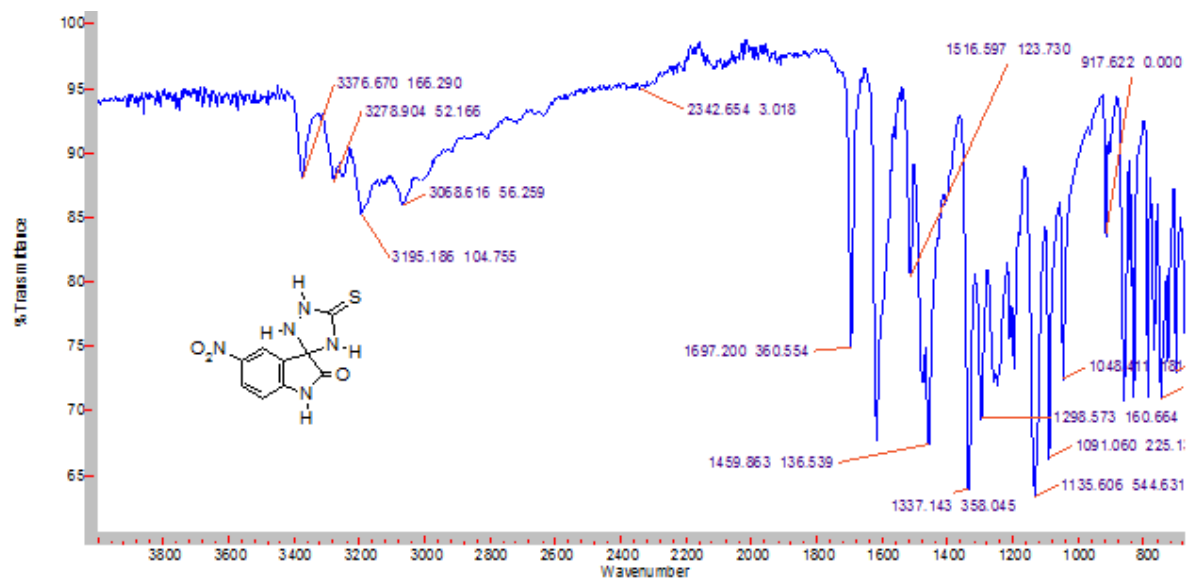

Entry m, Table 2b

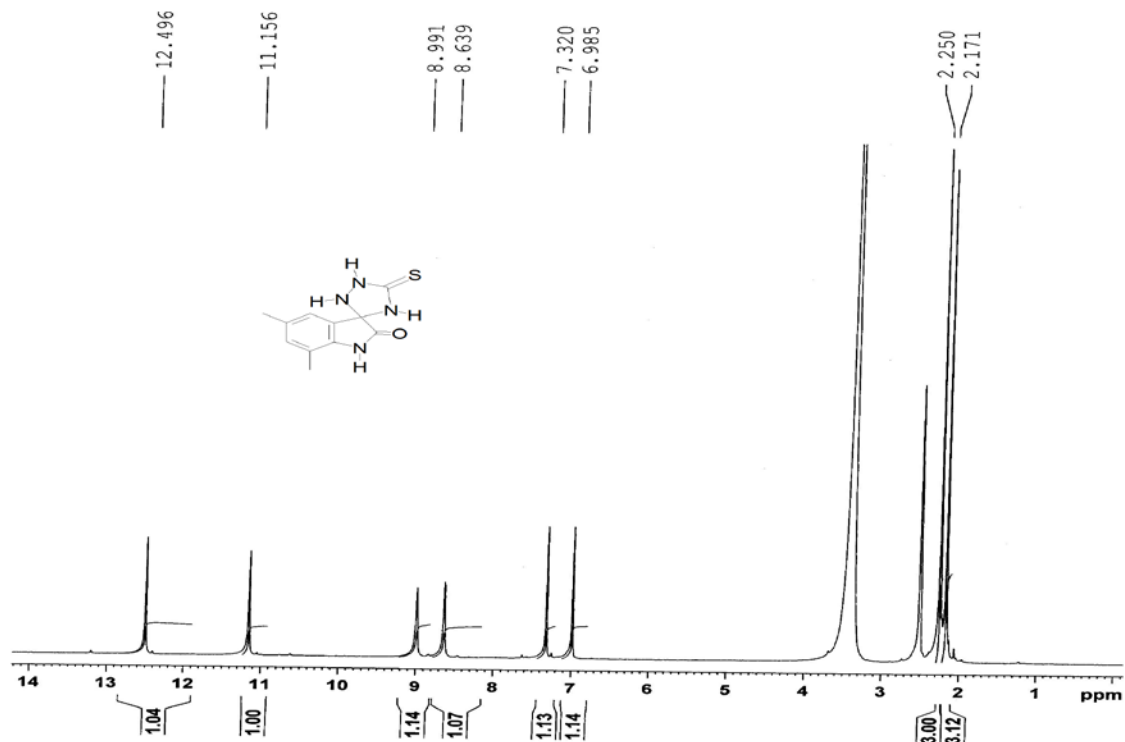

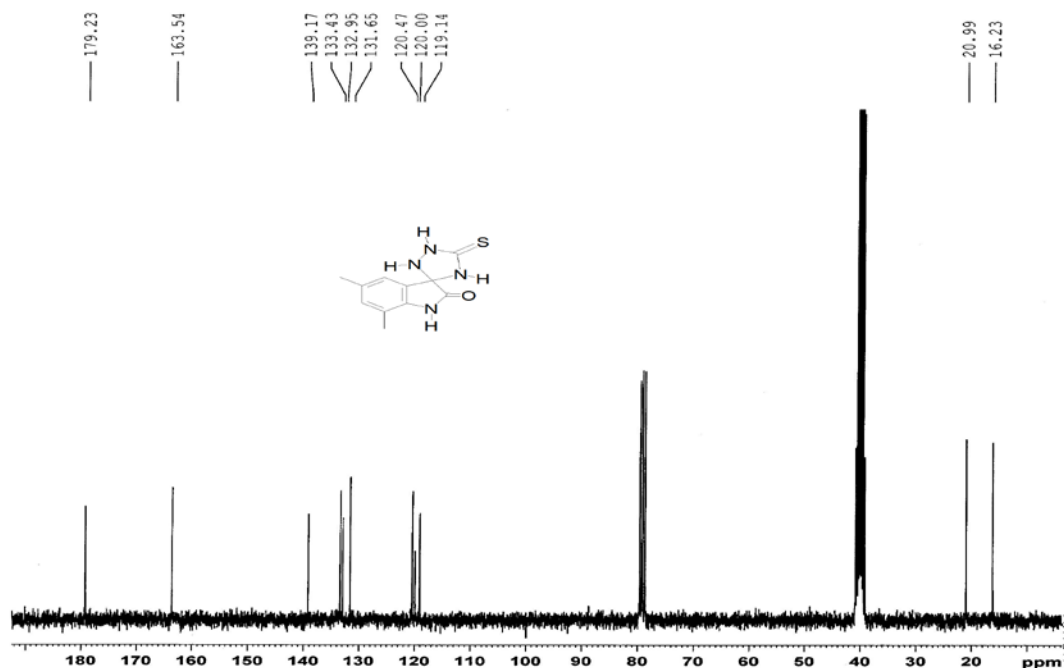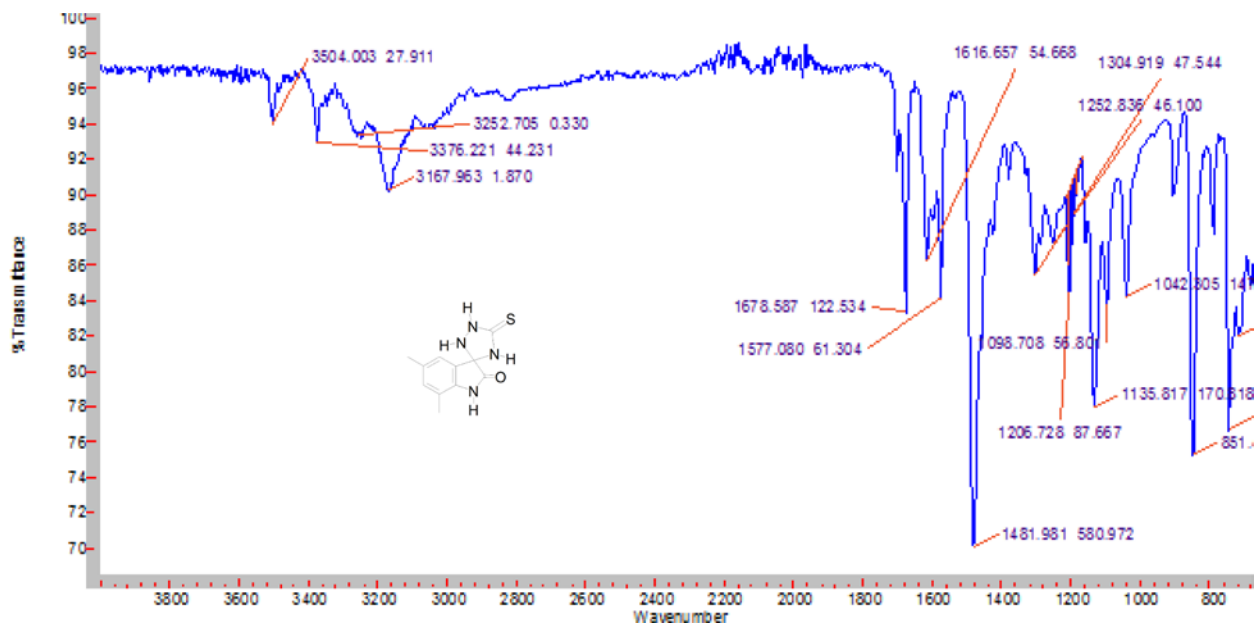

Entry n, Table 2b:

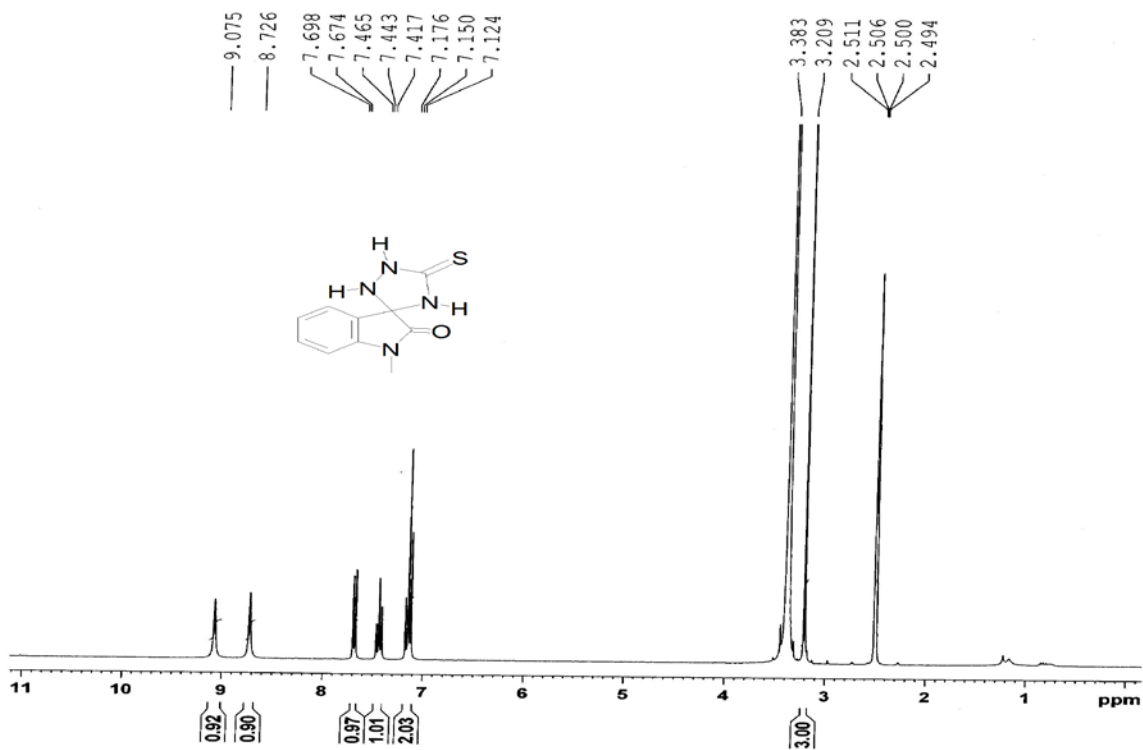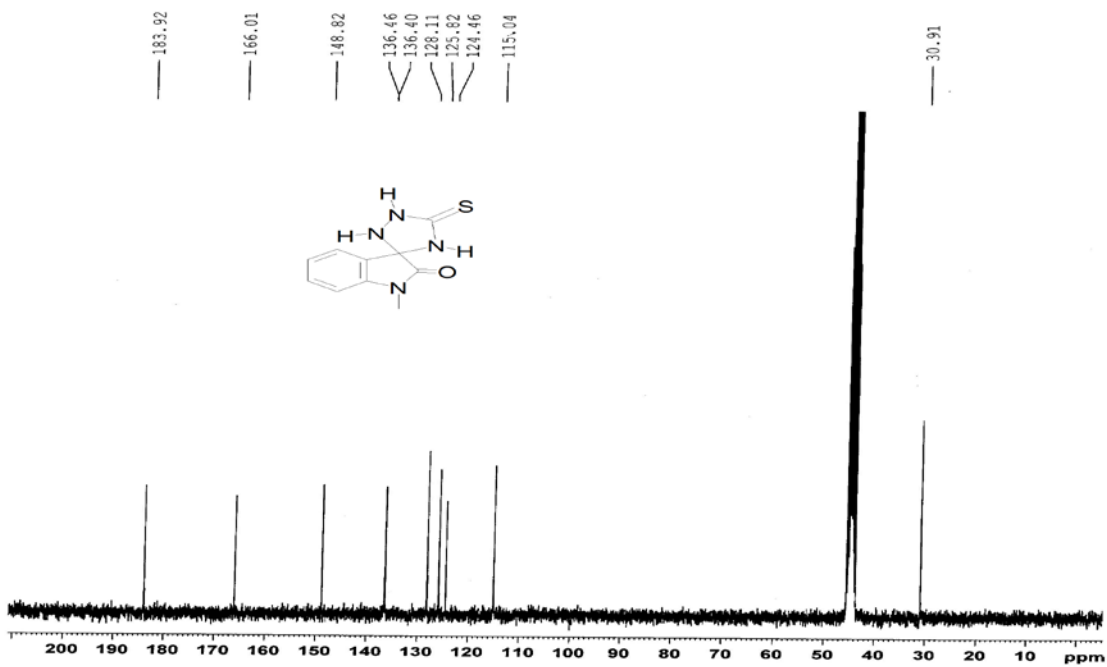



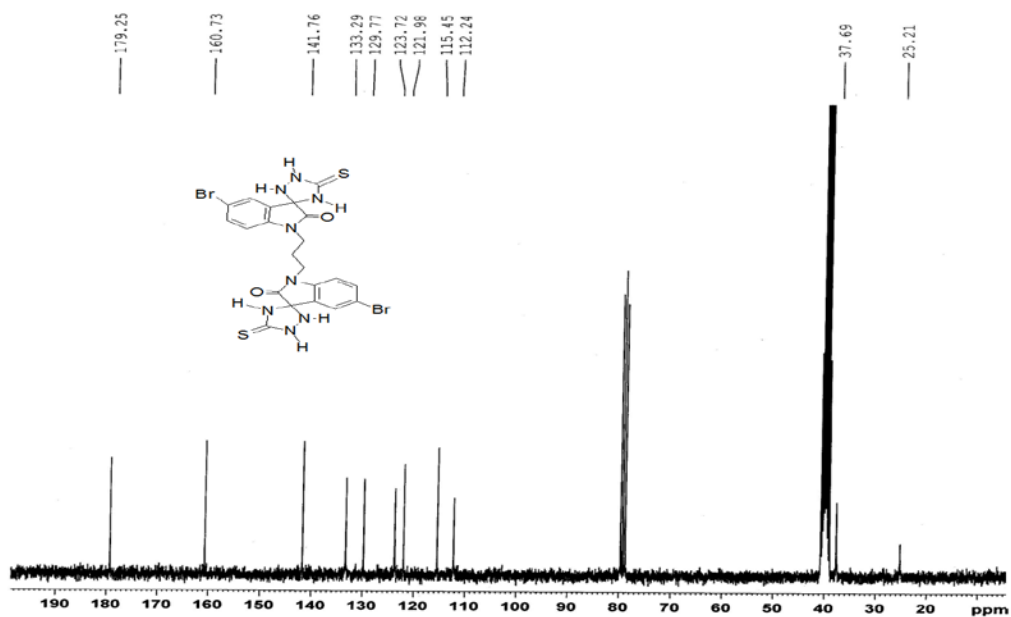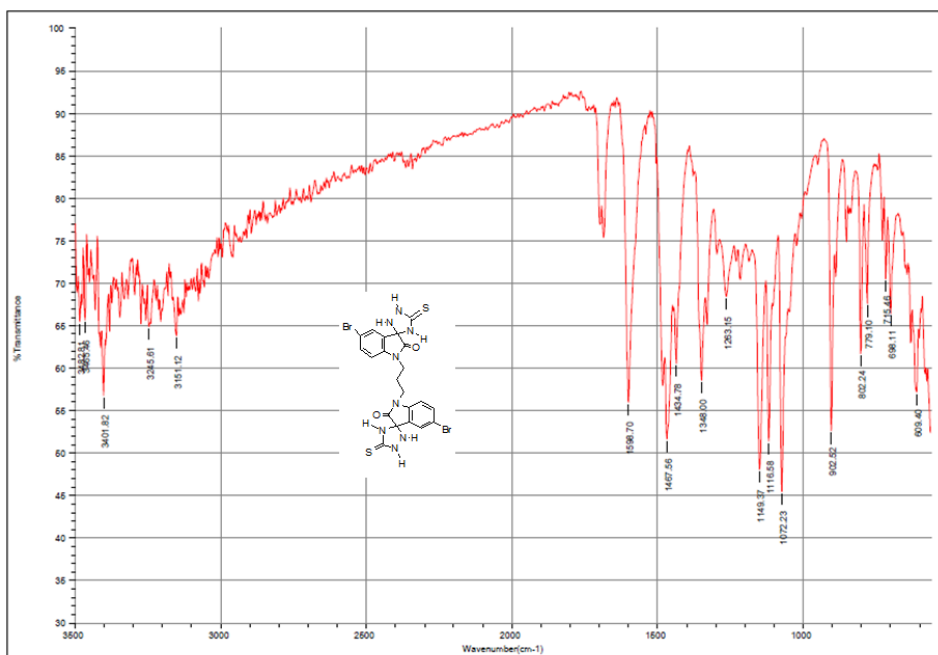

Supplement: c3ra44641g.pdf [file c3ra44641g.pdf]
